# Supplementary material for: Study protocol for a randomized controlled trial to test for preventive effects of diabetic foot ulceration by telemedicine that includes sensor-equipped insoles combined with photo documentation
Source: Springer Nature journal article supplement (doi:10.1186/s13063-019-3623-x), 2019-08-22

# Intelligent insole for diabetic foot ulcer prevention

Isabell.walter@med.ovgu.de  
Ahmad.alhajjar@med.ovgu.de

**Clinic for Nephrology and Hypertension,  
Diabetology and Endocrinology  
Otto von Guericke University Magdeburg**

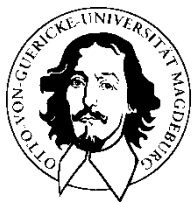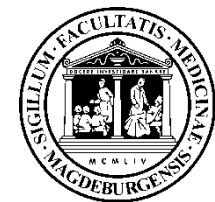

# Overview Lecture

---

What is **diabetic foot syndrome**?

How do **foot ulcers** develop?

Checklist for your **foot health**

**Study:** Smart Prevent Diabetic Feet

# Our feet carry us through life

We spend about **25-57% of** our lives on our feet.

Totally, 150 million steps could circle the **earth for 3 times.**

An area of 10 x 10 cm<sup>2</sup> bears our entire body weight.

The foot must withstand approx. 450kg/100cm<sup>2</sup> pressure with each step

Bones of both feet make up almost a **quarter of the total bones of** the body

# Dangers to our feet

## **Very dangerous:**

Injuries (ulcers)

## **Significance for diabetics:**

Foot injury at 2 - 10%.

Risk of foot injuries increases with nerve damage and previous ulceration (up to 60%/year)

## **Germany:**

60,000 amputations per year  
because of a diabetic foot ulcer

70% of all amputations are due to  
of a diabetic foot ulcer

## **What's a diabetic foot?**

**Foot changes** due to diabetes mellitus.

They **promote** the formation of **foot ulcers**.

## Two causes:

**vessel damage**

Arteriosclerosis / Clots  
Oxygen supply to the legs  
disturbed

**nerve damage**

Sensory disturbance (formication)  
*In the process:*  
loss of feeling  
Disruption of muscle and skin nutrition  
with muscle cramps and muscle atrophy

How do foot ulcers develop?

## nerve damage

Sensory disturbance (formication)

*In the process:*

loss of intuition

Disruption of muscle and skin nutrition  
with muscle cramps and muscle atrophy

**What happens when you  
can't feel your feet?**

## How do foot ulcers develop?

### Two major problems with loss of intuition in the feet

**1. injuries go unnoticed**

**2. incorrect loads lead to restricted circulation**

You wouldn't notice the little stone in the shoe.

You feel no pain if you stand on one spot for too long.



## **ulcer formation due to mechanical stress**

### **Causes:**

Incorrect loading, loading always in the same place, injury

**cornea formation**

**bleeding under the skin**

**ulceration  
of the skin**

**Deep foot infection**

# How do foot ulcers develop?

---

## 1. skin changes

pay attention ...

# How do foot ulcers develop?

---

## 1. skin changes

pay attention ...

**dry skin**

# How do foot ulcers develop?

---

## 1. skin changes

pay attention ...

**increased horny skin formation**

## How do foot ulcers develop?

---

### 1. skin changes

pay attention ...

**SKIN CRACKS**

# How do foot ulcers develop?

---

## 1. skin changes

pay attention ...

**NAIL FUNGUS**

**bruises**

**SIGN: REDNESS / SWELLING**

**bruises**

**SIGN: BLISTER FORMATION**



cornea formation

callused cornea with  
haemorrhage

**Beginning of ulceration**

Frequent locations of pressure sores/blisters/ulcers

**especially the areas between the toes**

## Unnoticed violations

The lack of sensation of pain, for example, means that **small stones in the shoe can** no longer be detected in time.

One consequence is progressive, often inflammatory ulcers on the feet.

How do foot ulcers develop?

# Ulceration

# Checklist Foot Health

Prevention is better than cure!

## Important measures

1. Foot inspection
  2. Cream feet
  3. Remove corns
  4. Nail care
  5. Check shoes
- } **on a daily basis**

## Prevention

Take a **fixed time of day** to check and care for your feet, for example in the evening before going to bed.  
A **hand mirror** is suitable for checking so that you can see all the areas of your foot well.

# Checklist Foot Inspection

- Is your foot **swollen**?
- Is the skin **reddish**?
- Does the foot feel **overheated**?
- Do you see a **blisters** or a **bruise**?
- Are there **calluses** or **corns**?
- Are there **injuries** such as cracks, scratches, stings or wounds?
- Is the skin in the **toe interdigits** yellowish and torn?
- Are the **nails** thickened and yellowish or whitish **discolored**?
- Is a **nail** ingrown?



## Cream

Due to disturbed perspiration, diabetic feet are very dry and brittle. To maintain or increase the moisture and elasticity of the skin, you can use skin care creams or foams.

Especially suitable are **creams and foams that** contain fat are quickly absorbed and provide sufficient moisture. Many users prefer foams because they offer sufficient moisture, but do not burden the skin with too much fat, are less sticky and absorb more quickly.

## Cream

- Care creams or care foams (foam creams)
- Omit toe interstices.

The foams usually contain three important ingredients:

- 1. Urea:** moisturizing  
strengthens the immune function/  
regenerative ability
- 2. Pentavitin:** natural ingredients of the cornea
- 3. Panthenol:** moisturizing  
promotes wound healing

# Skin protection

## **Good, good, good:** **Prevent athlete's foot**

In case of foot or nail fungus, you should contact your doctor.

**Bad:**  
Corn plaster/tinctures

## Remove cornea

### Good

corneal sponge/pumice stone

### Bad:

avoid sharp objects  
(scissors, clippers, corneal rasps)

## Nail care

(approx. every 2-4 weeks)

### Good:

glass nail files  
podiatrists

### Bad

pointed objects (scissors, nail clippers)

## Footbath

Prevention of:  
Inflammations, fungi and cracks

Requires:  
**Thermometer,**  
Washcloth,  
mild soap/wash lotion  
bowl

## Footbath

lukewarm water (**about 37°C**)

**maximum three to five minutes**

dry carefully afterwards

**Beware of already existing wounds:**

Avoid foot baths with iodine,  
as it can damage the  
healthy tissues in  
wounds.

## 6 tips for buying shoes

Not too tight

Not too loose

ideally seam-free

firm soles

sufficient space for inlays

If possible buy in the evening



## Insoles for diabetics

- Inserts ensure even pressure distribution,
- Check the degree of wear regularly,

## Special diabetic shoes

Ready-made special shoes

Orthopaedic made-to-measure shoes (exist as slippers, street shoes, sports shoes and bathing shoes)

**with :**

Removable, ready-made soft cushion sole

Diabetes-adapted foot bedding

### **Last, but not least:**

No matter what kind of shoes you wear - you should check every time before putting them on whether there are small objects like splinters or stones in the shoes.

## Diabetic socks for the diabetic foot

### **Properties :**

- antibacterial
- anti-infective
- anti-odour
- washable
- antifungal
- naturally

**Additional functionalities of  
Special diabetic socks:  
additional padding**

## compression stockings

- Compression stockings are a medical device that can be used to treat venous and lymphatic
- diseases, including the prevention of leg vein thrombosis.
  
- The thrombosis prophylaxis stocking (antithrombosis stocking) is used in hospitals and nursing homes to prevent thrombosis in bedridden and freshly operated patients.
  
- In patients with PADs, prescription and use should only be carried out under medical supervision.

## Taking wound healing seriously

Wounds you don't feel are not consciously disencumbered.

**Stay in bed** with wounds, **relieve** foot **as much as possible**

Alternative: forefoot or heel relief shoes

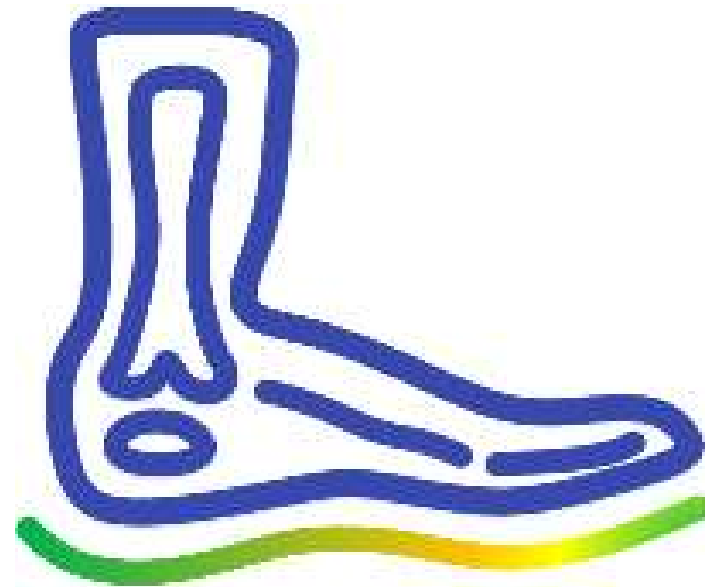

**Study: *Smart Prevent Diabetic Feet***

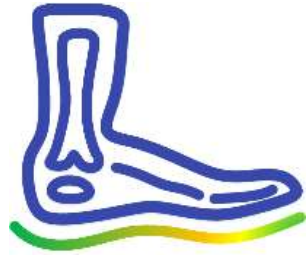

## Study procedure:

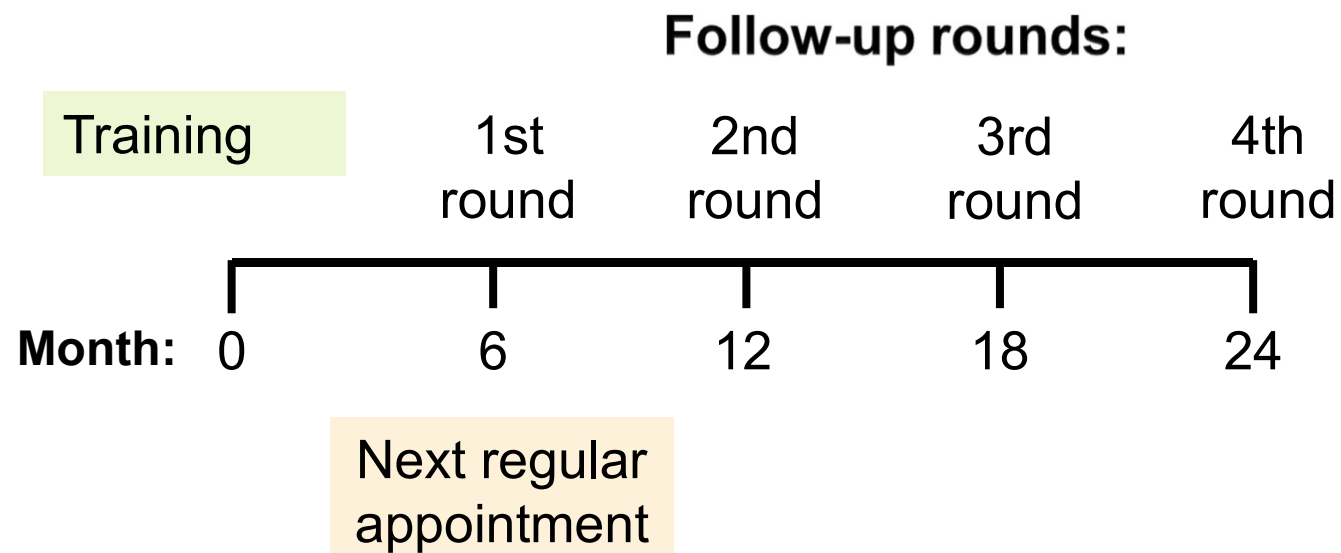

## When do I contact the Study Centre?

**Preliminary stages of an ulcer** (ulcer)

(skin redness, blisters, infections,  
wounds in the foot area)

**Ulcer** (ulcer)

Inpatient admission (planned and unplanned)

**Appointments**

*Contact:*

0391/ 67 -21615

0391/ 67 -21745

*Gladly at any time with further questions*



## Who's treating my feet?

Your general practitioner/diabetologist remains your **first point of contact!**

If there are any changes to the feet, **always contact the Study Centre!**

**First aid possible for injuries in the study centre!**

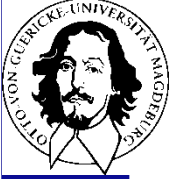

## Contact details

Clinic for Nephrology and Hypertension,  
Diabetology and Endocrinology,  
Otto-von-Guericke University Magdeburg

House 60 B, Level 2

Phone: 0391 /67-21615

0391 /67-21745

E-mail: [Claudia.Piehler@med.ovgu.de](mailto:Claudia.Piehler@med.ovgu.de)

[Isabell.Walter@med.ovgu.de](mailto:Isabell.Walter@med.ovgu.de)

[Ahmad.Alhajjar@med.ovgu.de](mailto:Ahmad.Alhajjar@med.ovgu.de)

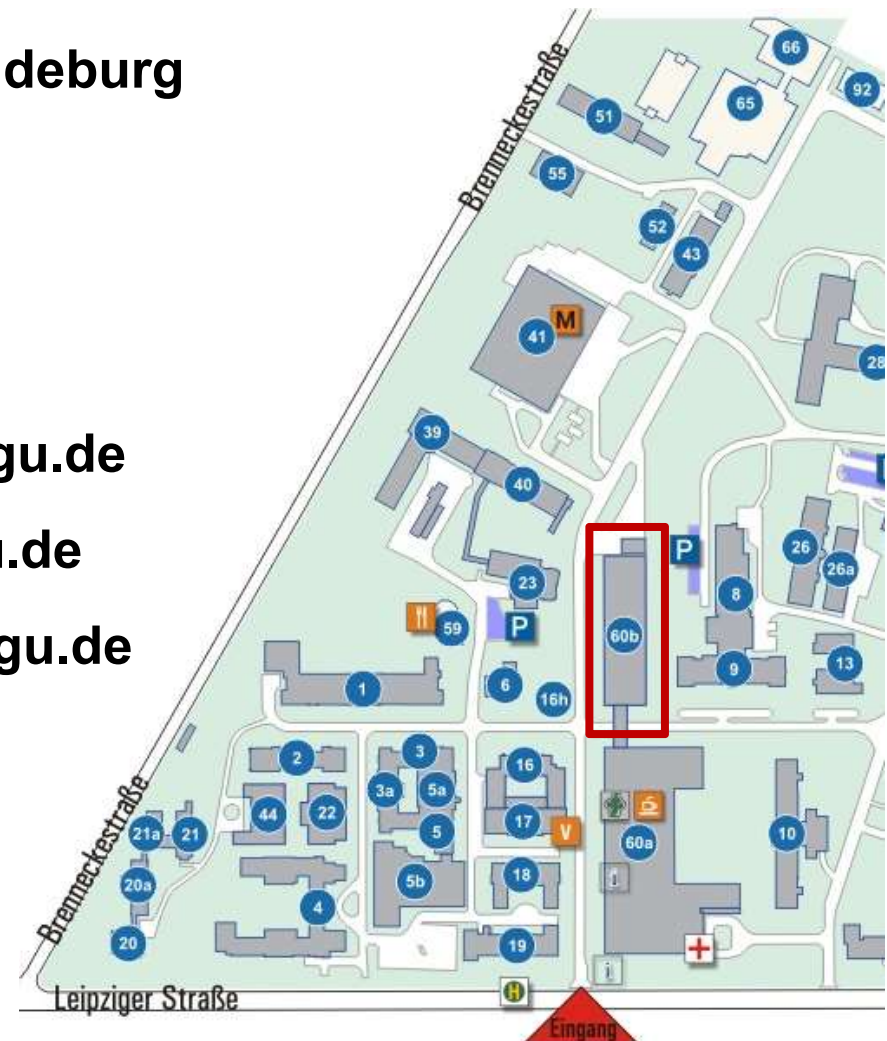

Supplement: MOESM2 [file 17093864]
