# Supplementary material for: Study protocol for a randomized controlled trial to test for preventive effects of diabetic foot ulceration by telemedicine that includes sensor-equipped insoles combined with photo documentation
Source: Springer Nature journal article supplement (doi:10.1186/s13063-019-3623-x), 2019-08-22
Supplement: MOESM3 [file 17093864]

# Intelligent insole and Smartphone application

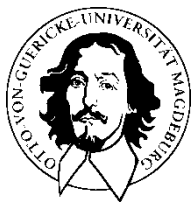

Isabell.walter@med.ovgu.de  
**Clinic for Nephrology and Hypertension,  
Diabetology and Endocrinology  
Otto von Guericke University Magdeburg**

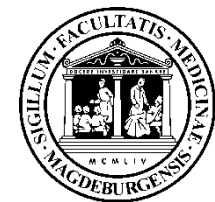

**In studies:**

Daily temperature measurements can detect ulcers on the feet about five weeks before they develop.

Resting the feet prevents ulceration in 2 out of 3 cases.

**We would like to support you,  
Identify dangers to your feet in good time**

**10 minutes a day for your feet**

# How to measure correctly...

**Morning**

**&**

time interval: >4 hours

**2x daily**

**Evening**

**Sitting**

pay attention

same measurement conditions

## Delivery of the study materials:

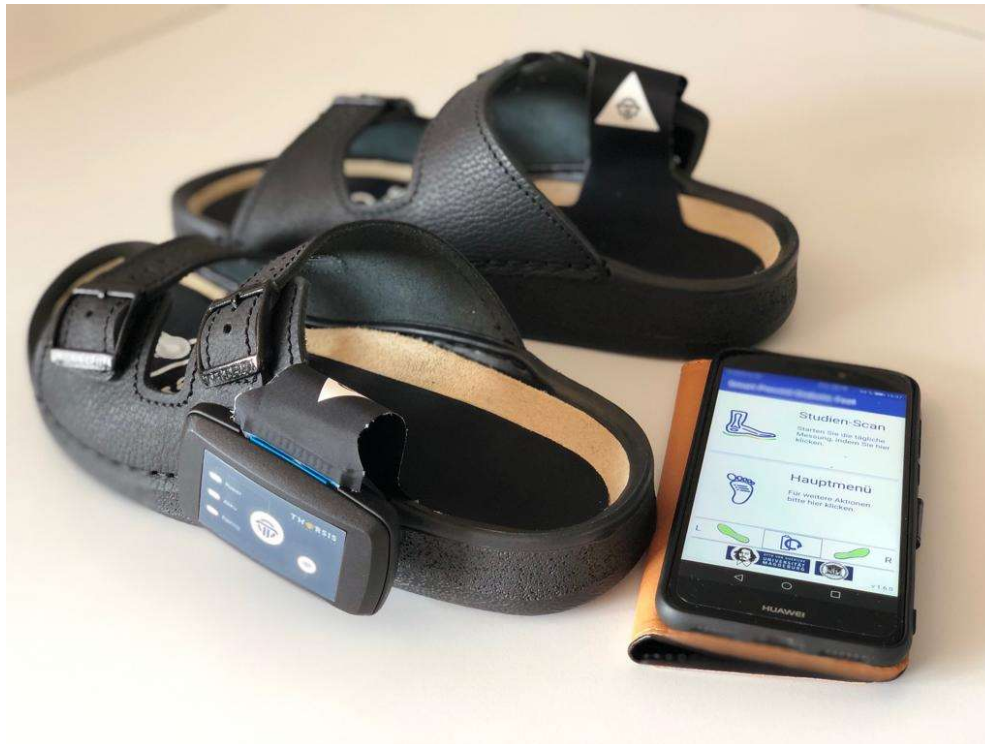

1 pair of slippers incl.  
1 pair of intelligent insoles

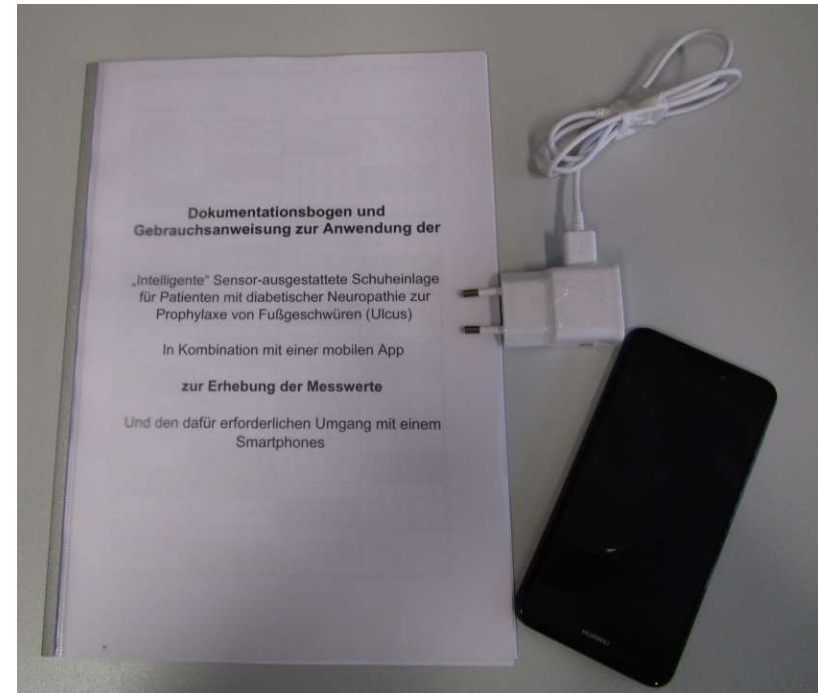

Mobile phone incl. charger  
Study handbook incl.  
instruction manual

**Please use equipment exclusively for study purposes!**

# Introduction of electronics

## Buttons

To **switch on** the electronics, please press the “ON/OFF” button once. A **0.5 sec green signal** of the “Power” LED indicates a successful start of the electronics.

To **switch off** the electronics, please press the “ON/OFF” button once again. A **0.5 sec red signal** of the “Power” LED indicates a successful close of the electronics.

To pair the electronics to the smartphone via Bluetooth, please press the “Pairing” button once. It will initialize a Bluetooth pairing mode (30 s). The “Pairing” LED will show orange during this period.

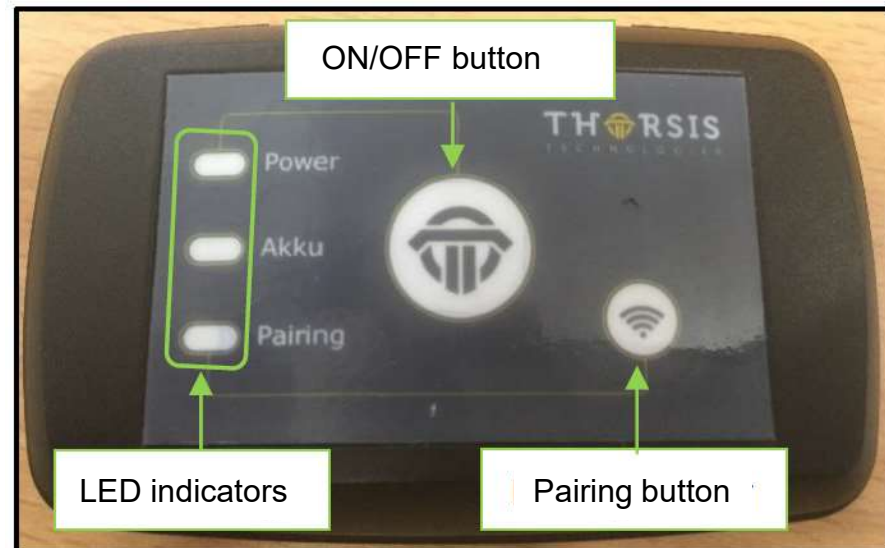

## Introduction of electronics

### LED Indicators

Power (double LEDs)

■ start-up

■ shutdown

Battery (double LEDs)

■ The electronics are correctly connected to the charging cable.  
The appropriate charging voltage is applied.

■ The battery is charging.  
This LED goes out as soon as the battery is fully charged.

Pairing (simple LEDs)

■ Insole is now ready for pairing. (duration approx. 30s)

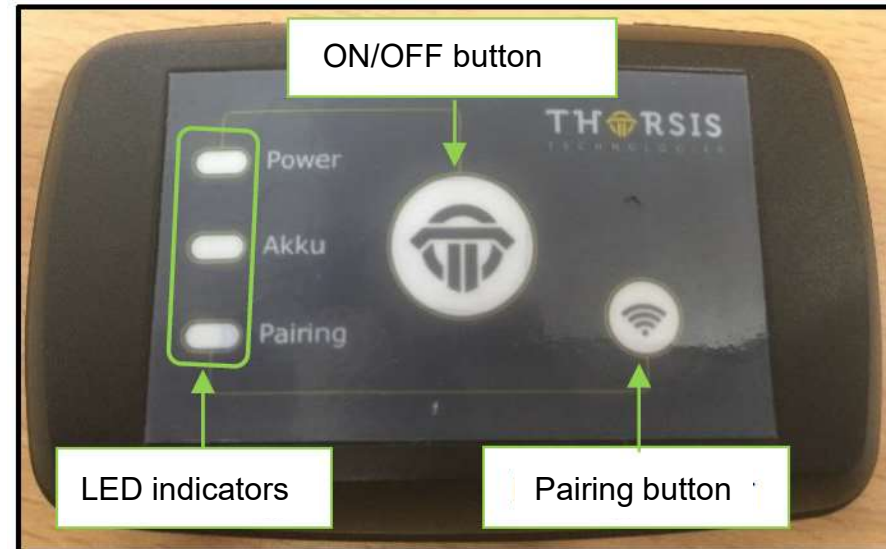

## Charging the electronic battery

Connect the two **electronic components** to the **socket** using the supplied **cables** and the **adapter**.

Pay attention to the **two-color LED "Battery"**. It shows red and green (two colors) when the battery is charging. It **only** lights **green** when the battery is **full**.

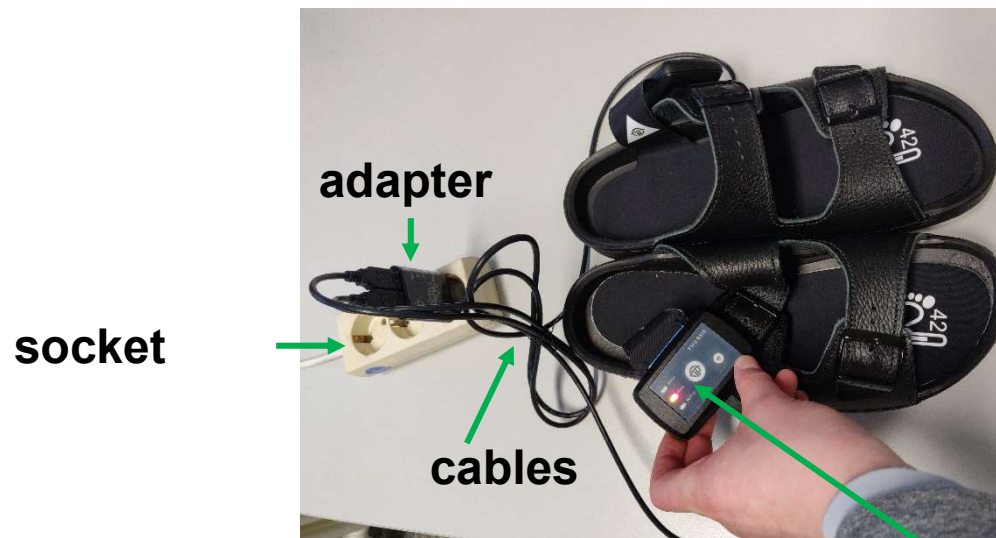

LED display  
(shows loading progress)

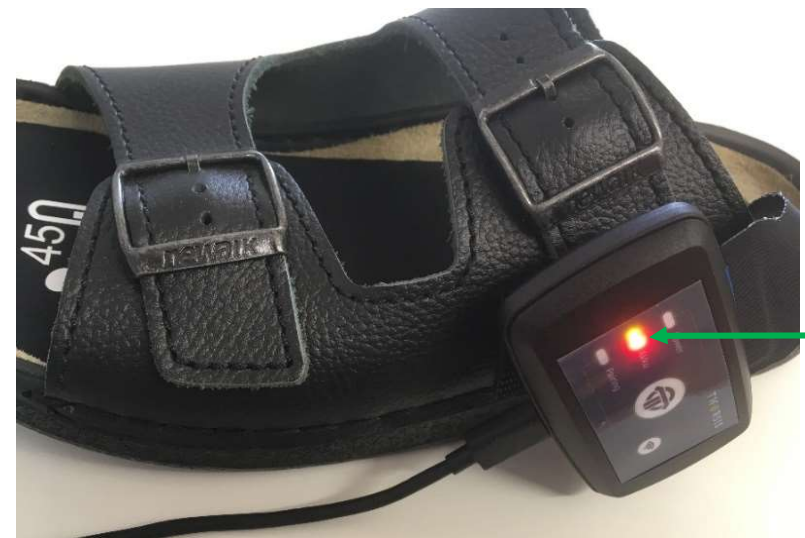

electronic components



# Application of the insole

---

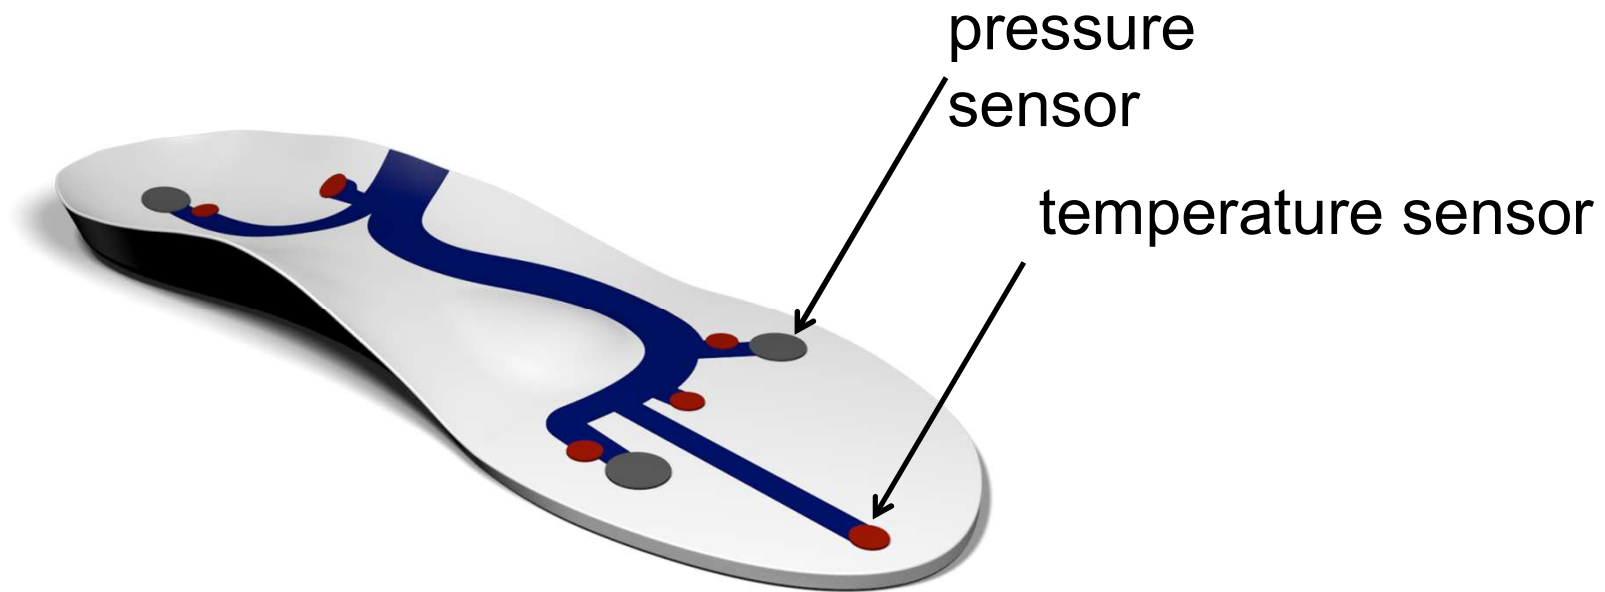

## 1. insoles

protect from moisture

## 2nd measurement

with socks  
on intact skin

# Study Smartphone

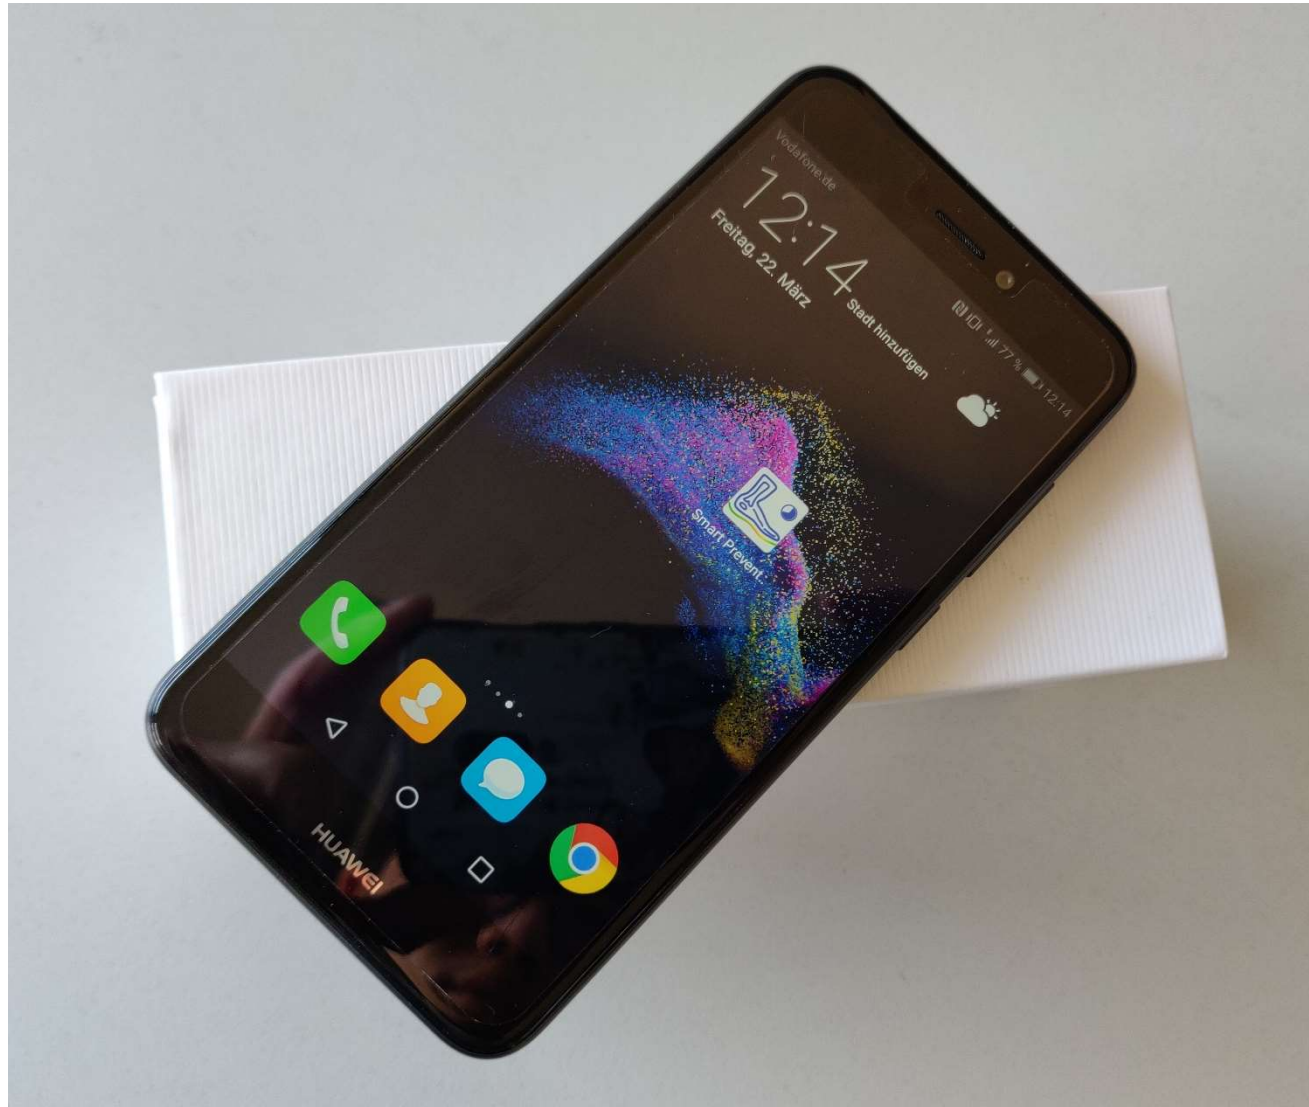

## Study Smartphone: Push Button

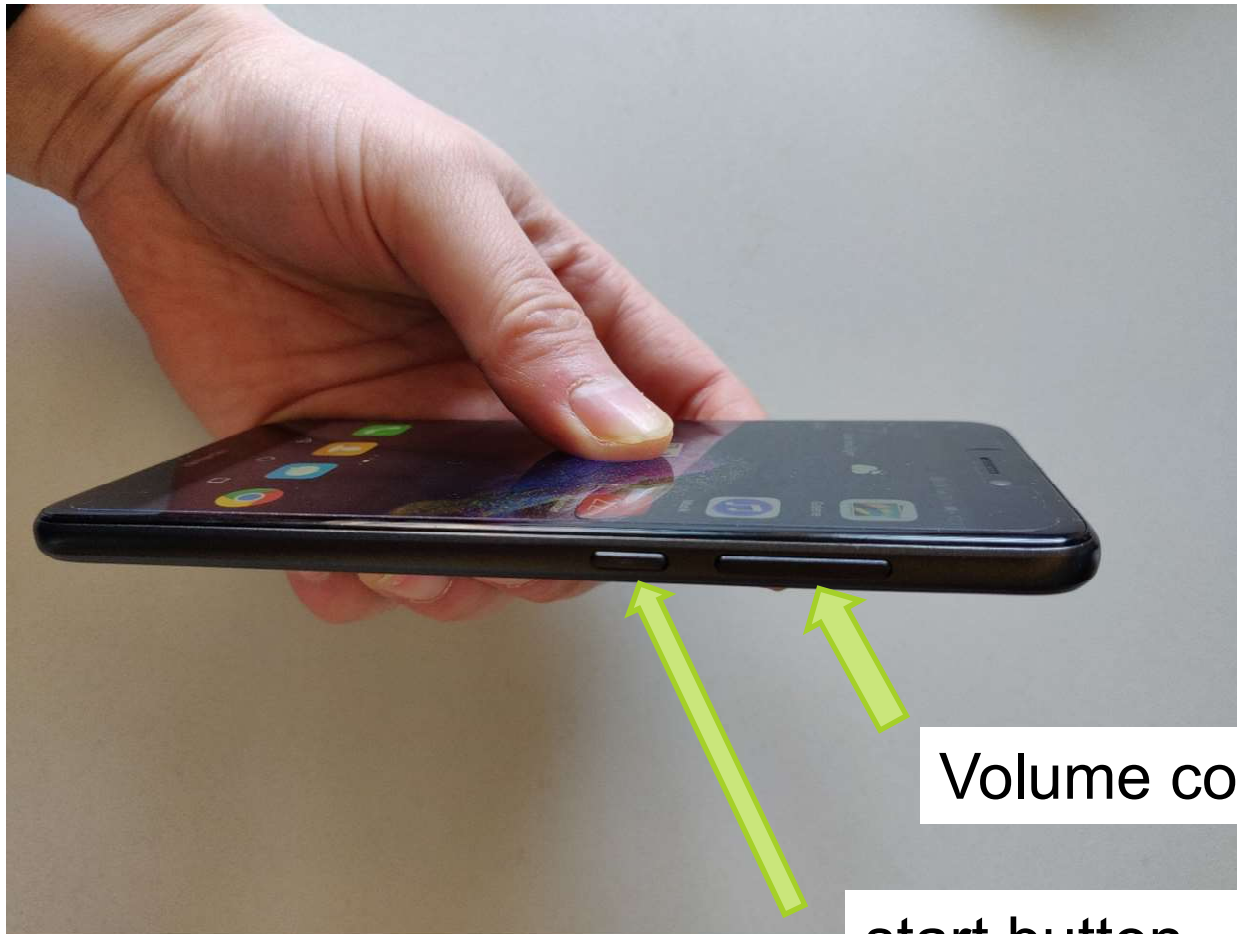

Volume control

start button

on/off switch

# Smartphone: Charging the battery

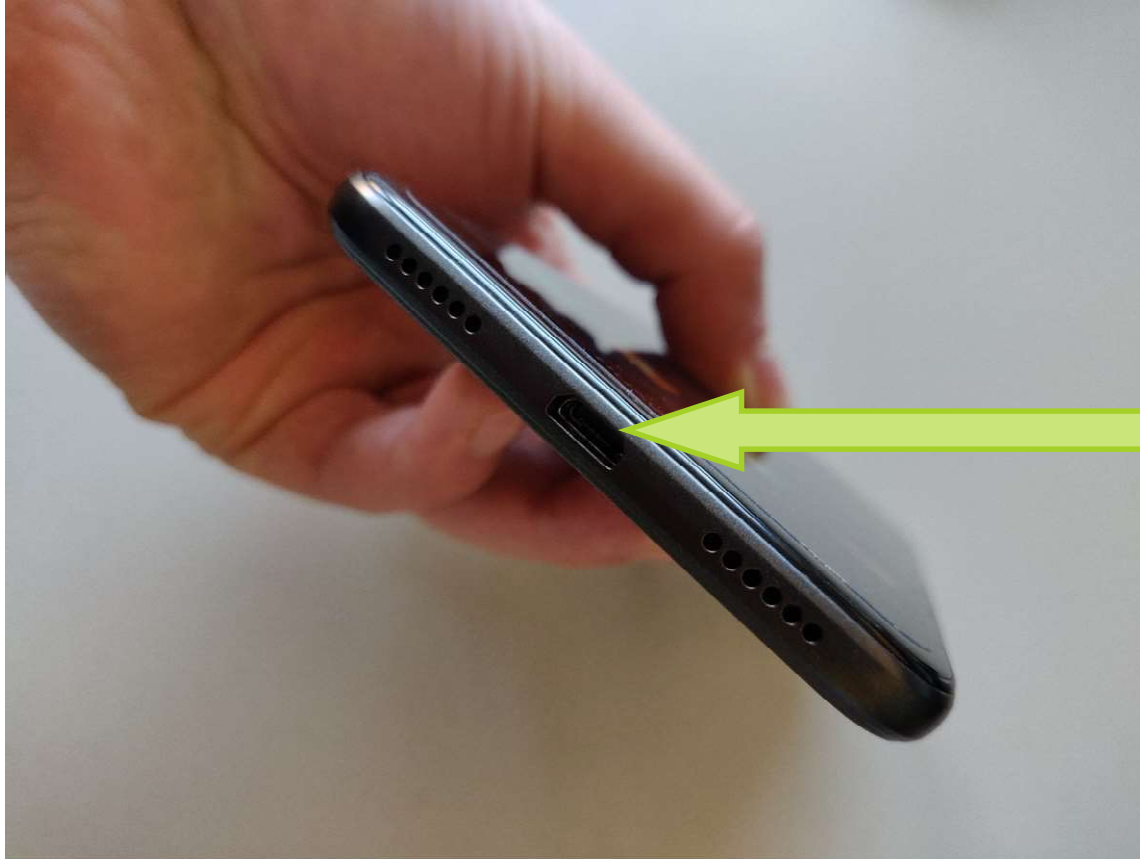

Connection for the  
charger

about: 1x daily  
Duration: approx. 4h

# Smartphone: Camera

front camera

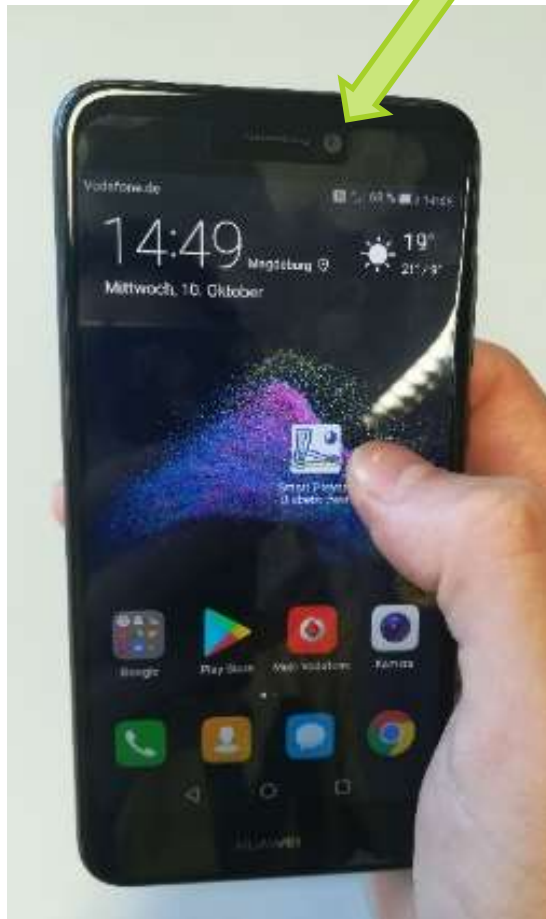

rear camera

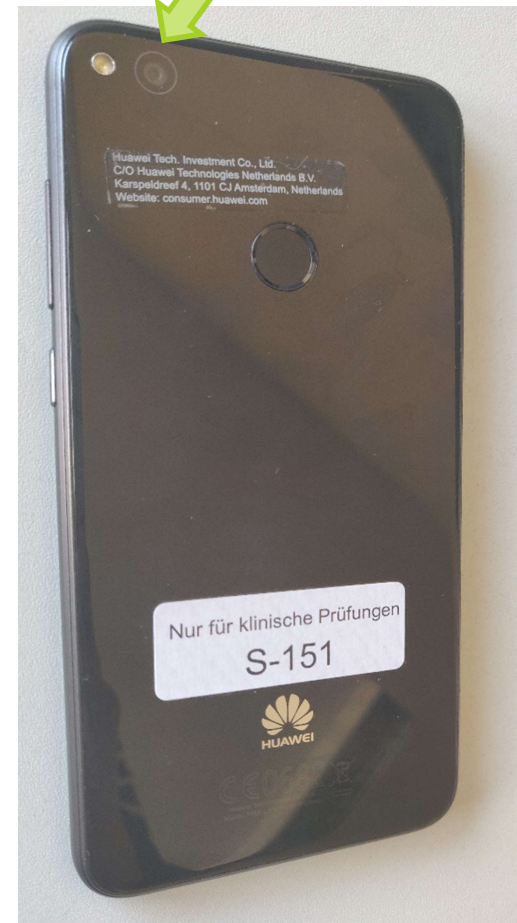

# Smartphone: Menu

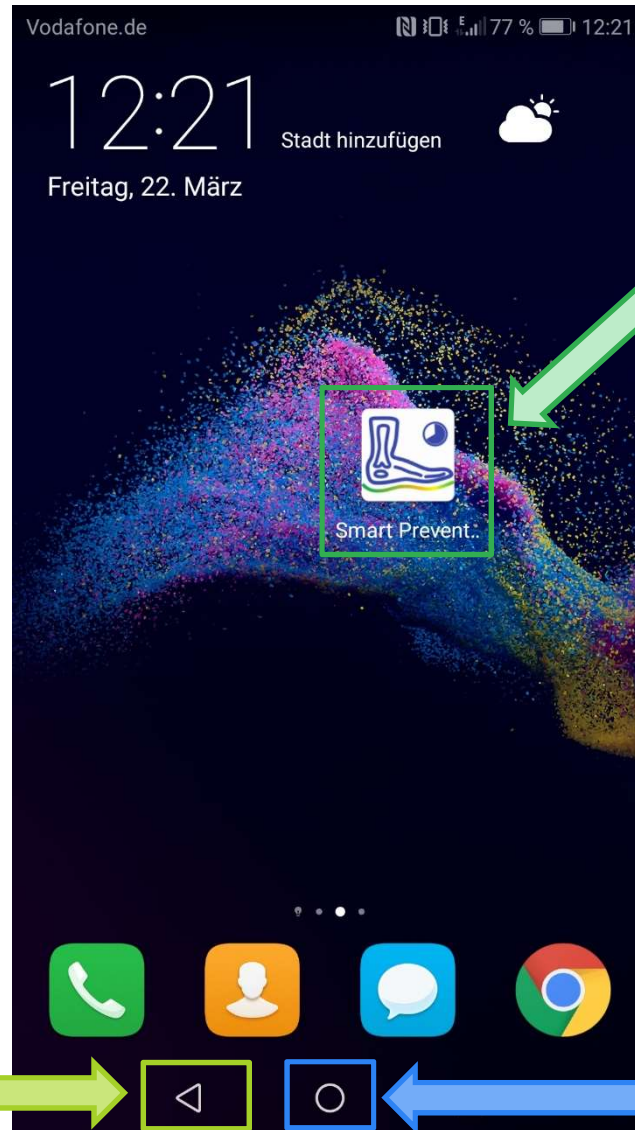

Study App

"Back button"

"Smartphone menu button"



# Recommended order for carrying out an ulcer measurement

## Step 1:

Start the smartphone.

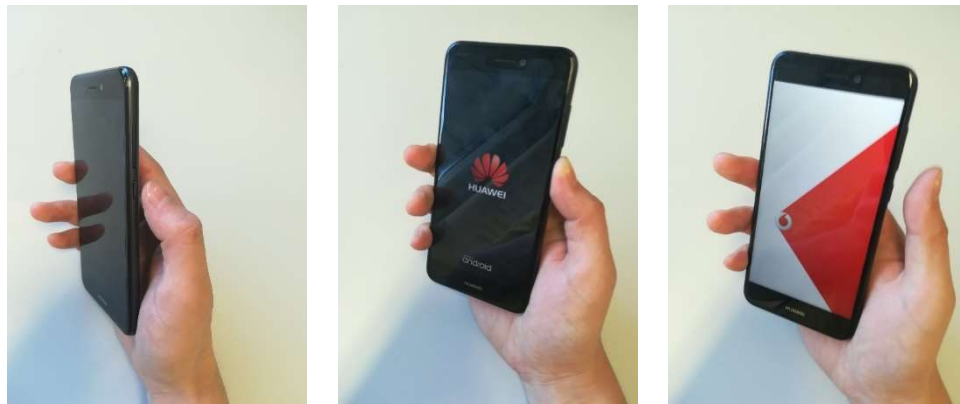

Switch on mobile phone...

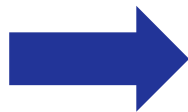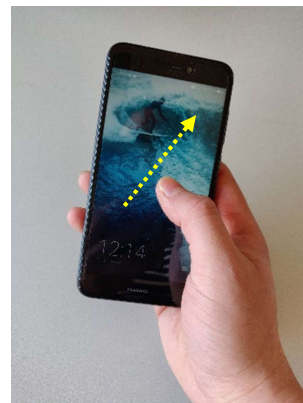

Wipe the screen with your finger

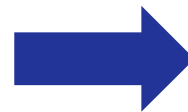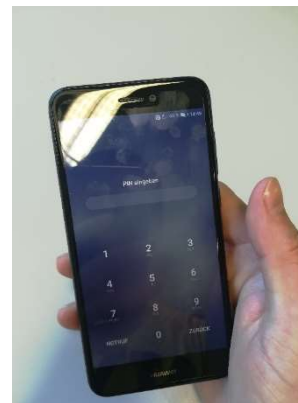

Enter PIN (1111)

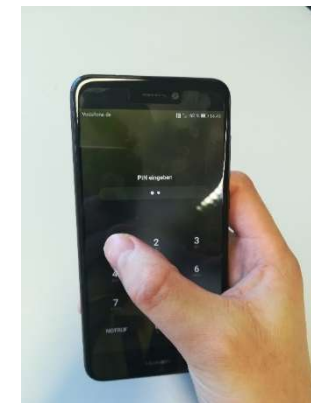

# Recommended order for carrying out an ulcer measurement

## Step 2:

Launch the Smart Prevent Diabetic Feet application

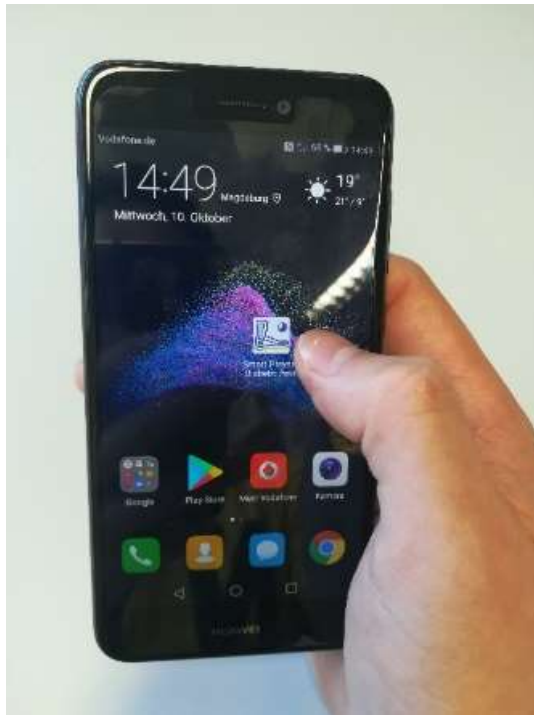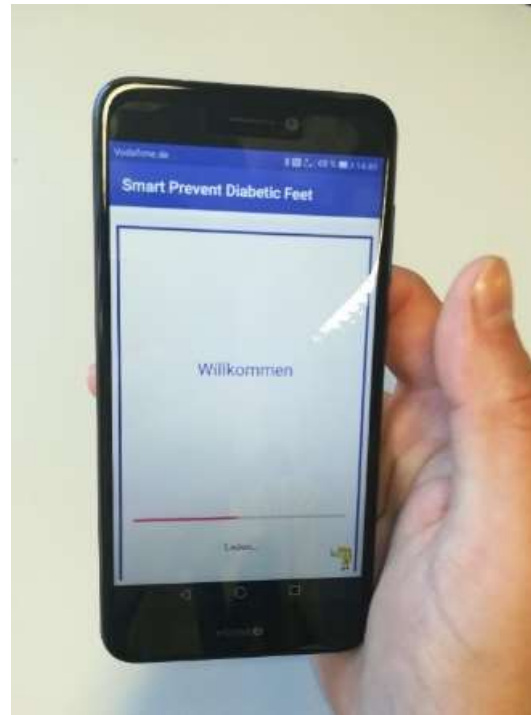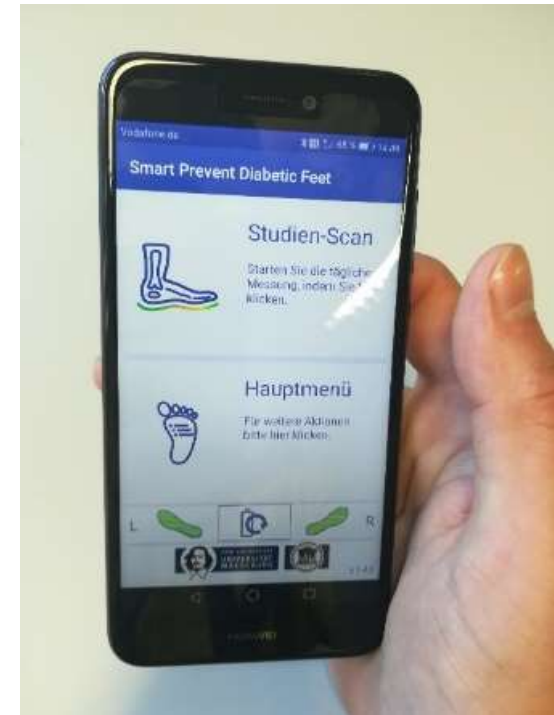

Open Smart Prevent Diabetic Feet App



## Recommended order for carrying out an ulcer measurement

### Step 3:

Switch on the electronics of the two insoles by pressing the central switch button (**ON/OFF button**).

The "Power" LED will flash **green**.



## Recommended order for carrying out an ulcer measurement

### Step 4:

Put on the study shoes with the inlaid intelligent insole.

### Step 5:

Take a straight, relaxed sitting position with both feet on the floor.

### Step 6:

Make sure that your feet cover all sensors of the two insoles. Check the position of your feet in the slippers.

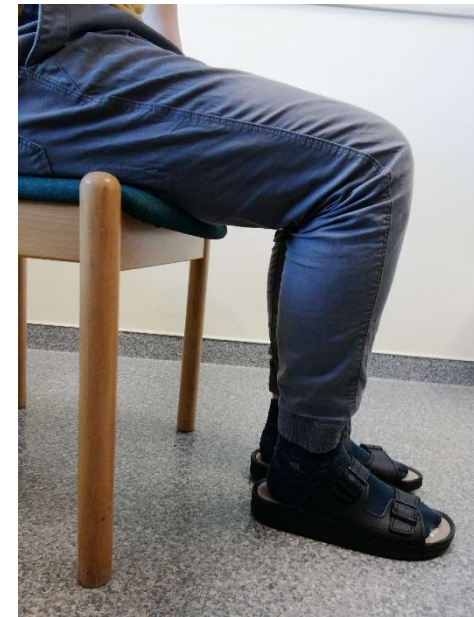

# Recommended order for carrying out an ulcer measurement

## Step 7:

Start the study scan (the temperature measurement) on the study app of the mobile phone.

## Step 8:

The measuring process takes 3 minutes. For this period, please do not leave the sitting position and keep your feet calm in your shoes.

## Step 9:

You receive your measurement result in the study app of the mobile phone. If necessary, follow the recommendations for action.

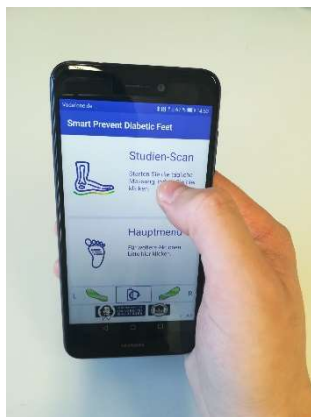

Start measurement

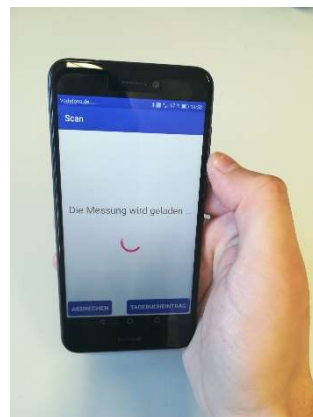

Measurement is loading

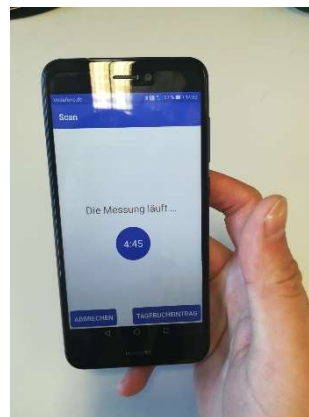

Measurement running 3 min

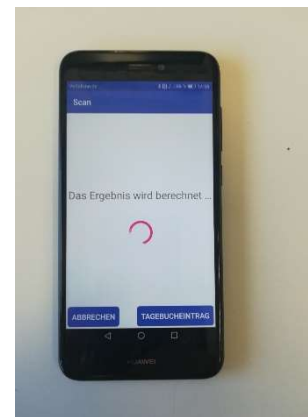

Result is calculated

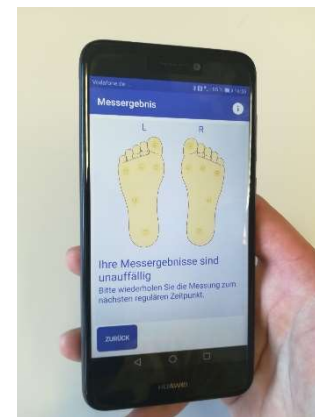

measurement result

## Recommended order for carrying out an ulcer measurement

### Step 10:

Switch off the electronics of the two insoles by pressing the central switch button again (**ON/OFF button**).

The "Power" LED will flash **red**.



## alarm gradations

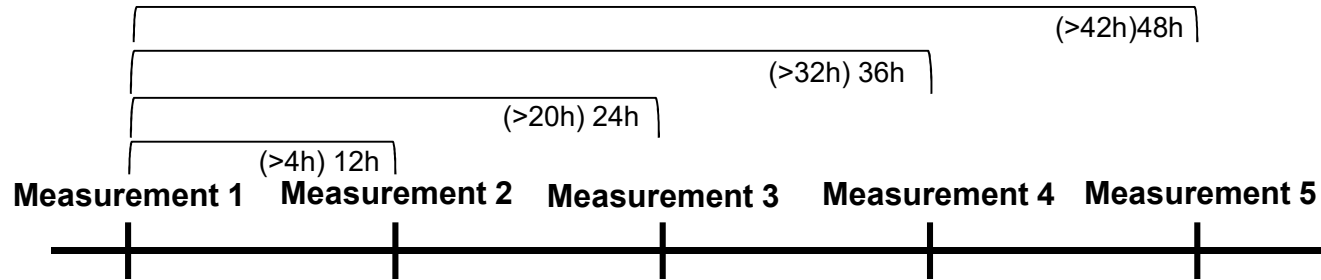

### alert stage

|          |                                                     |                                                                                         |                                                                  |                                |
|----------|-----------------------------------------------------|-----------------------------------------------------------------------------------------|------------------------------------------------------------------|--------------------------------|
| <b>1</b> | $\Delta > 1,5^{\circ}\text{C}$                      |                                                                                         |                                                                  |                                |
| <b>2</b> | $\Delta > 1,5^{\circ}\text{C}$                      | $\Delta > 1,5^{\circ}\text{C}$                                                          |                                                                  |                                |
| <b>3</b> | $\Delta > 1,5^{\circ}\text{C}$                      | $\Delta > 1,5^{\circ}\text{C}$                                                          | $\Delta > 1,5^{\circ}\text{C}$ Photo / Observation /Foot Resting | Photo after 5 days             |
| <b>4</b> | $\Delta > 1,5^{\circ}\text{C}$                      | $\Delta > 1,5^{\circ}\text{C}$                                                          | $\Delta > 1,5^{\circ}\text{C}$                                   | $\Delta > 1,5^{\circ}\text{C}$ |
| <b>K</b> | $\Delta > 3^{\circ}\text{C}$                        | Measurement control: $\Delta > 3^{\circ}\text{C} \Rightarrow$ Contact technical service |                                                                  |                                |
| <b>T</b> | Contact technical service due to measuring problems |                                                                                         |                                                                  |                                |

### Interpretation of alarm levels

Assessment of whether alarm is correct by study physician:  
 Observation / Foot resting for at least 5 days / during this time visit the Study centre / after 5 days measured values are again divided into alarm levels

downgrade (level 0) in the case of a unobtrusive measurements or after contact with a study centre & all-clear there

# additional app functions

mobile phone application

# History of the

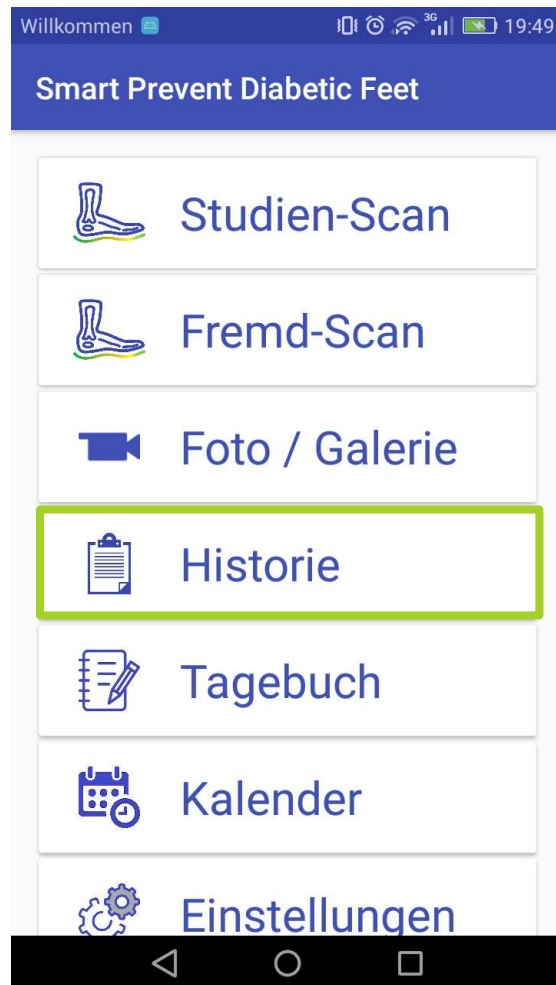

Viewing **temperature curves** on the feet

# History of the

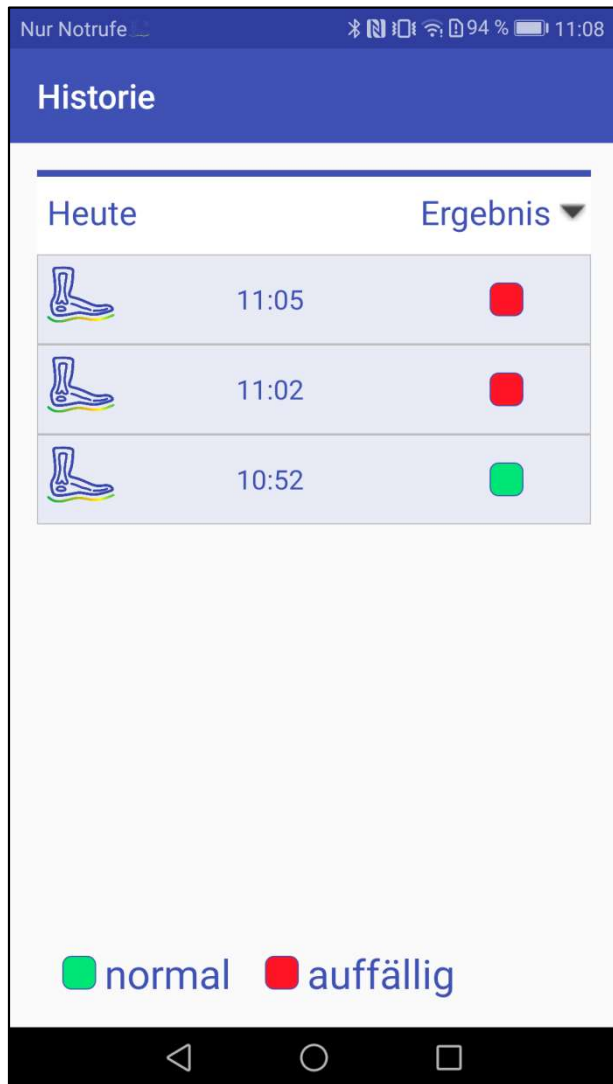

to view the measurement result



# Result messages

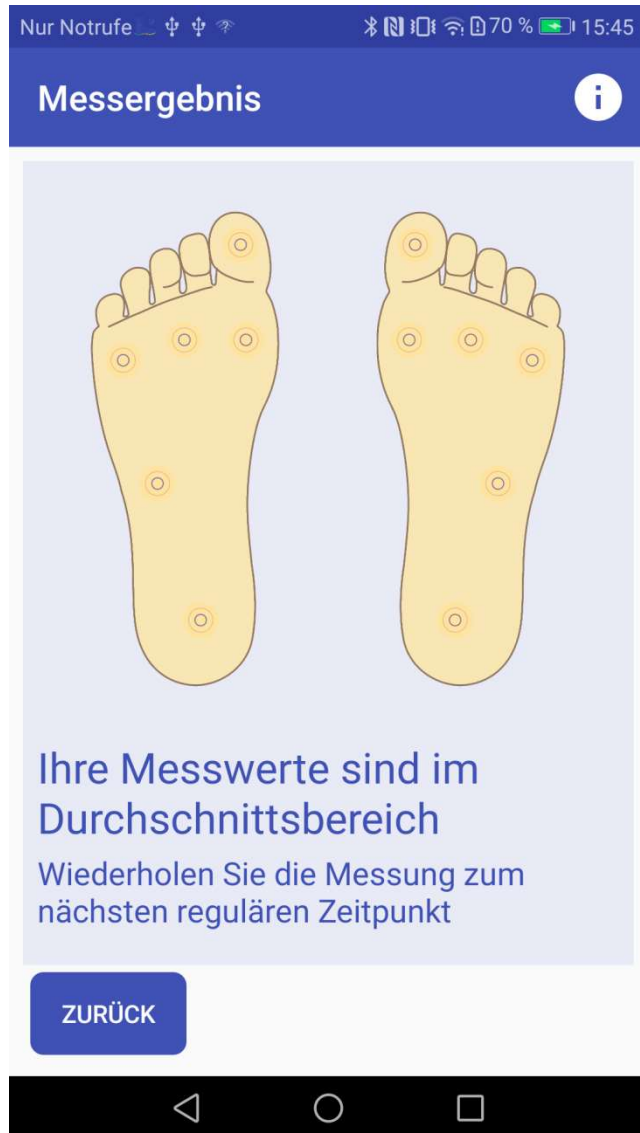

**No abnormalities**

(continue with next regular measurement)

# History



to view the measurement result

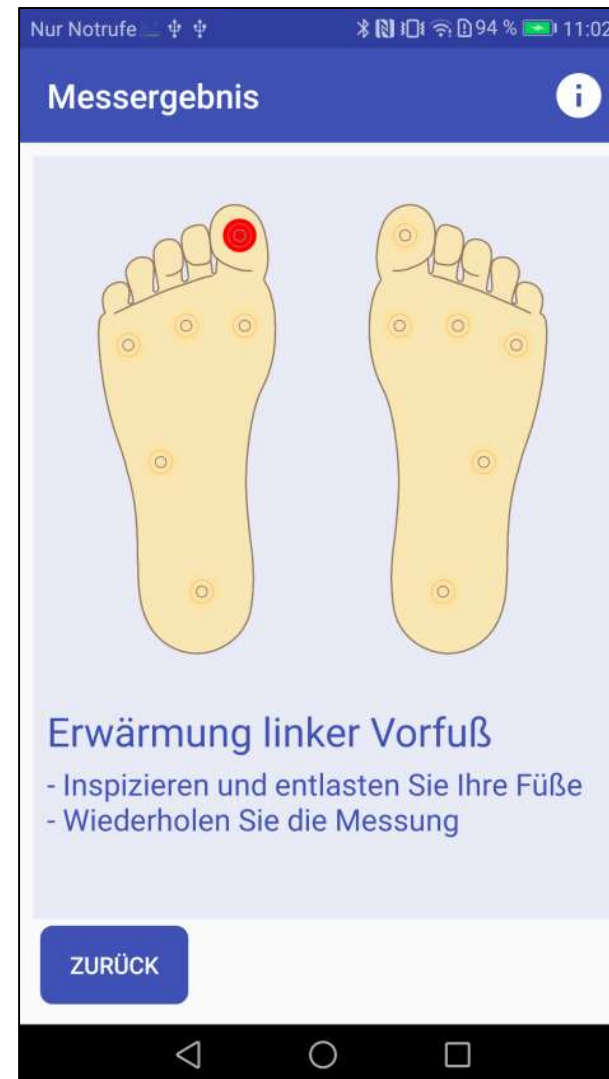

# 1. Rest your feet

mobile phone application

# Result messages

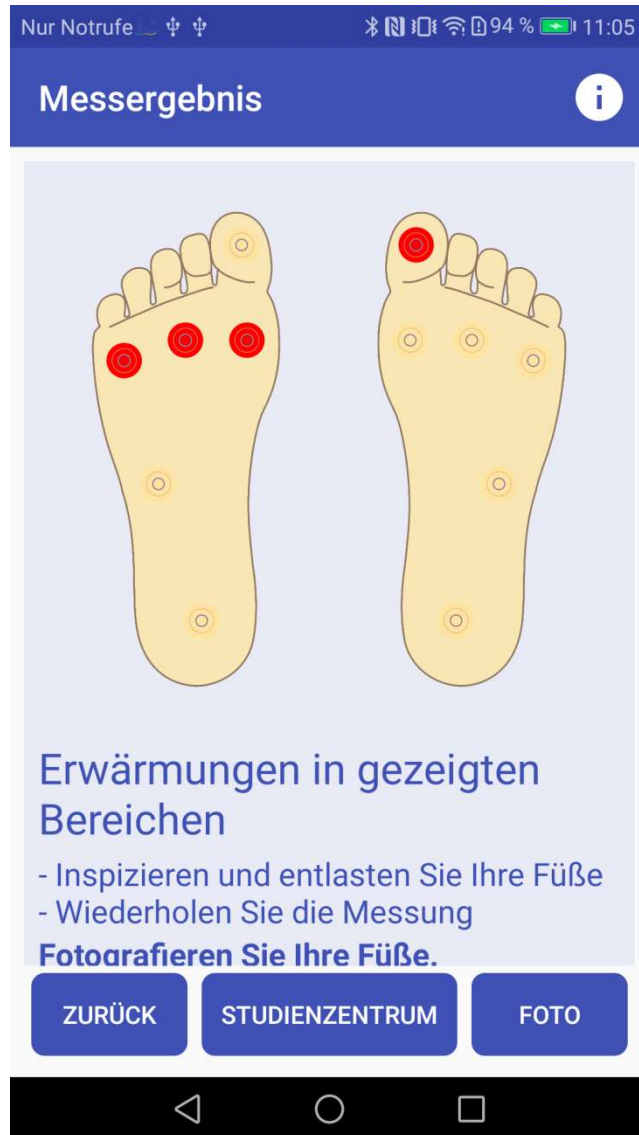

# Result messages

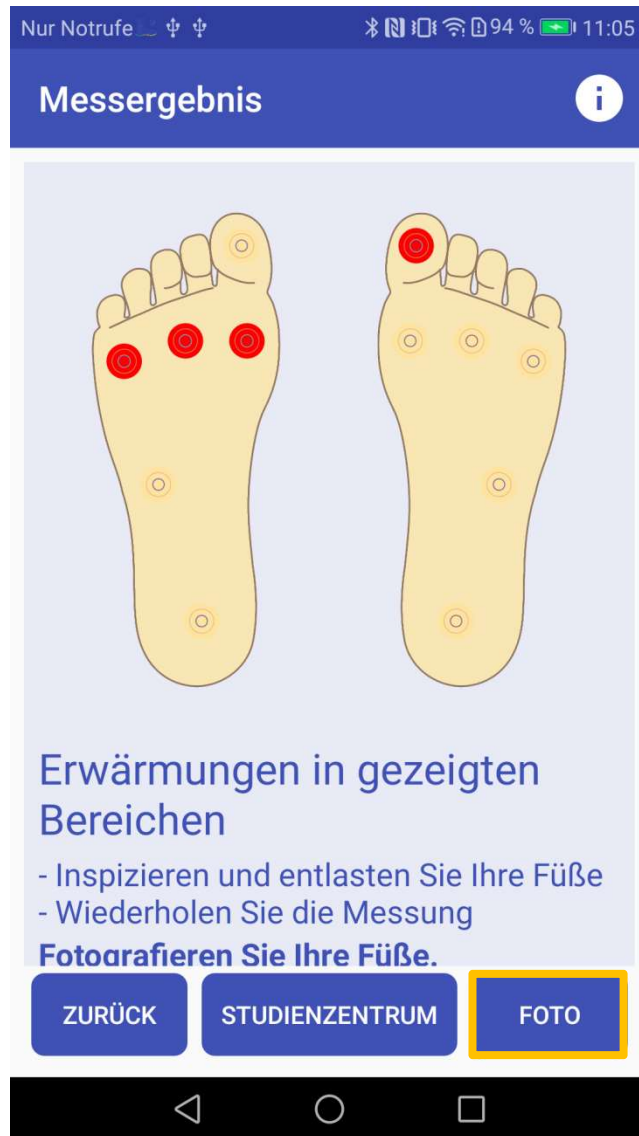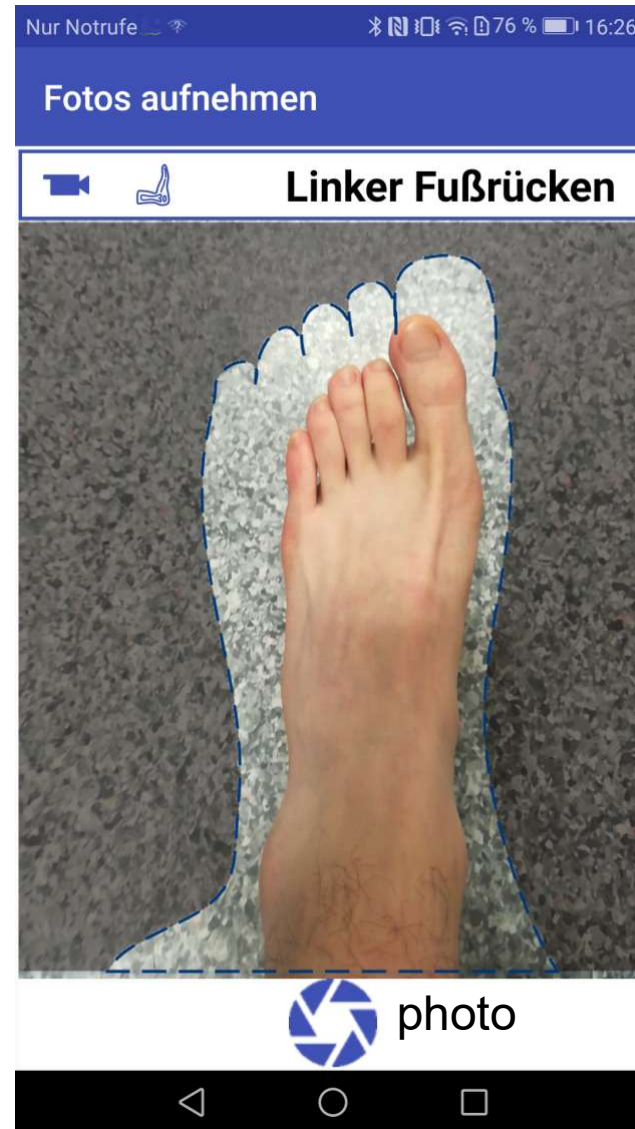

Evaluation of the scan -  
conspicuous findings

# Photographing with camera of mobile phone

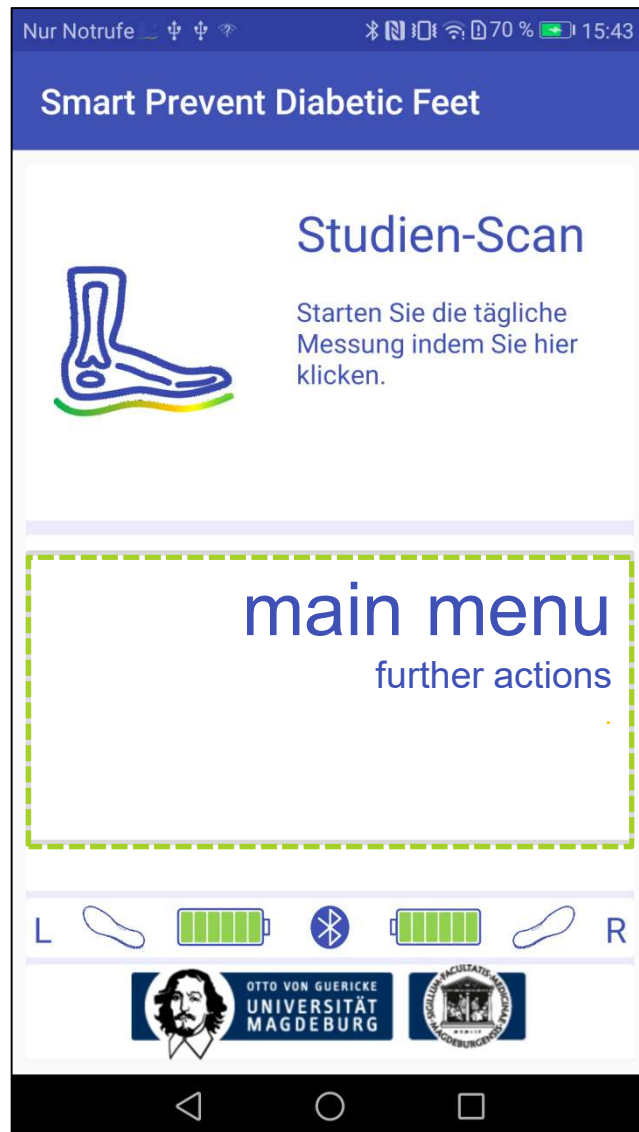

← Start main menu

# Photographing with camera of mobile phone

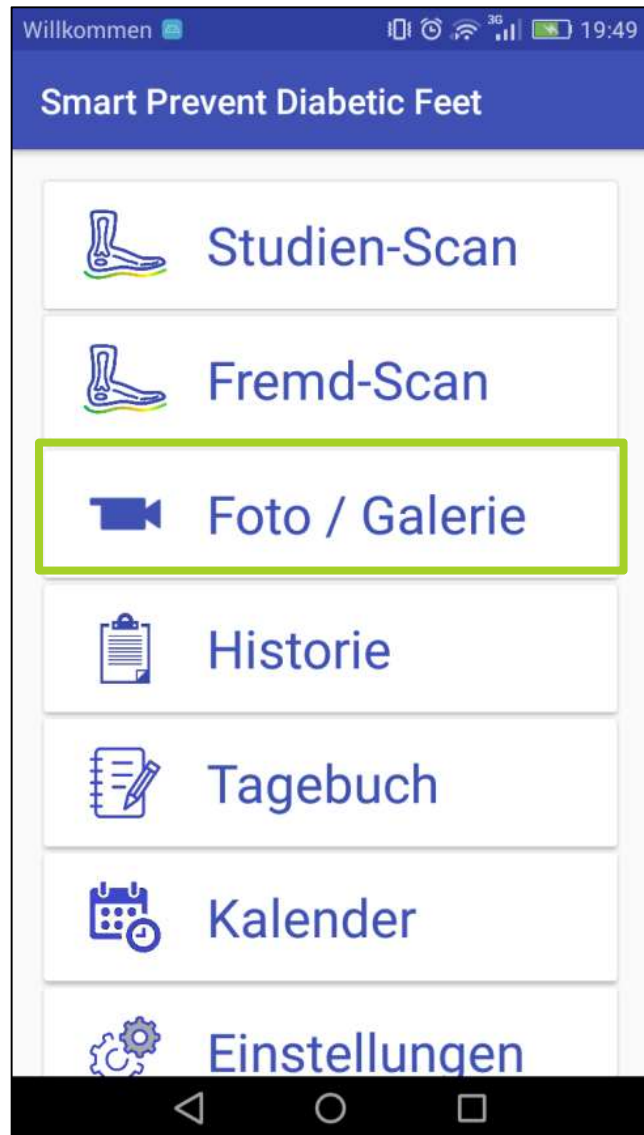

← Select photo

# Photo / Gallery

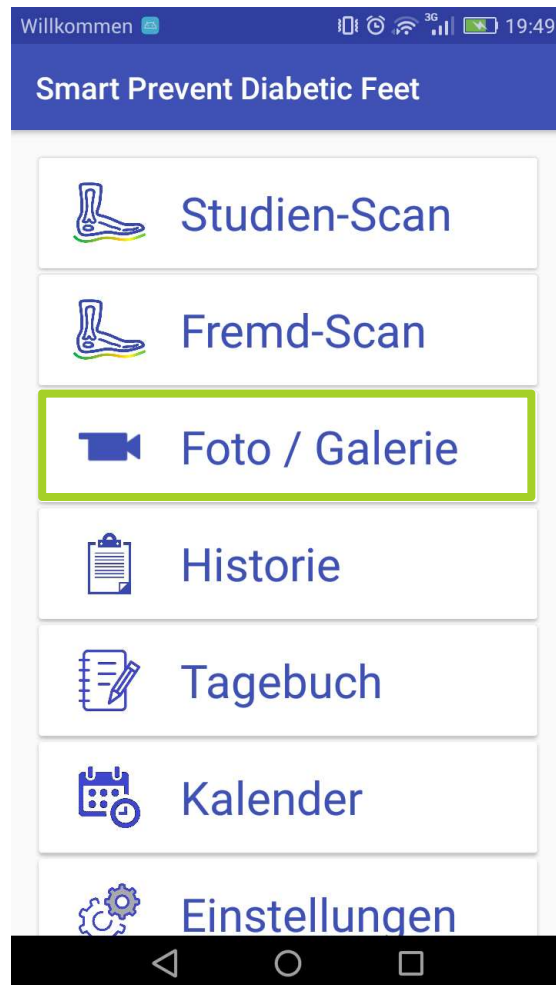

For **taking** photos when abnormality occurs to the foot (bladder)

&

**Viewing photos**



# Photographing with camera of mobile phone

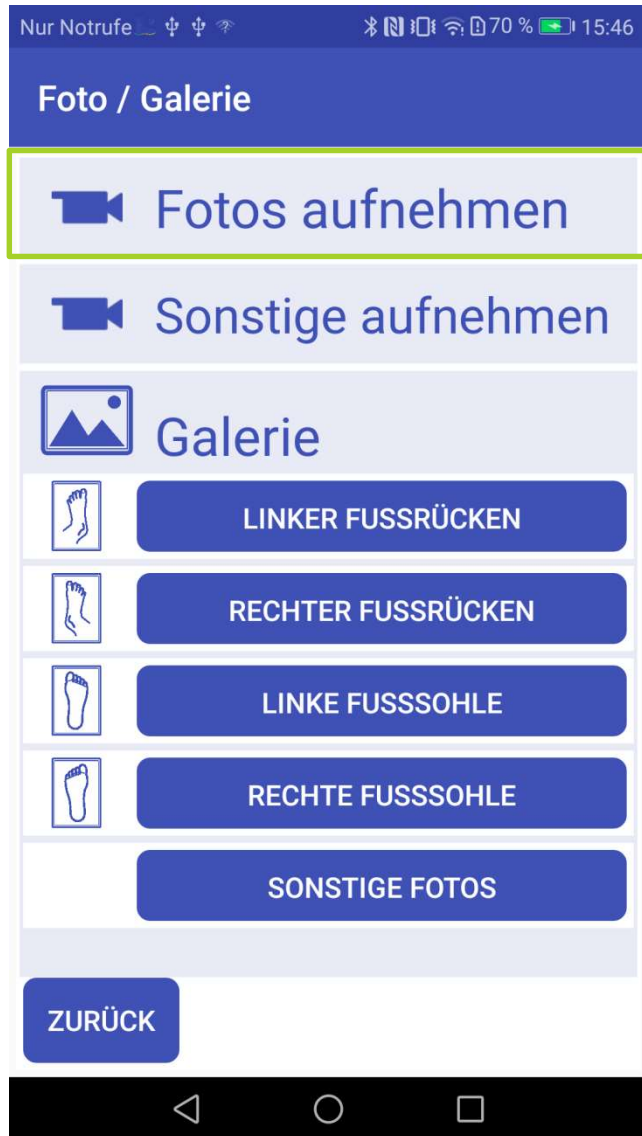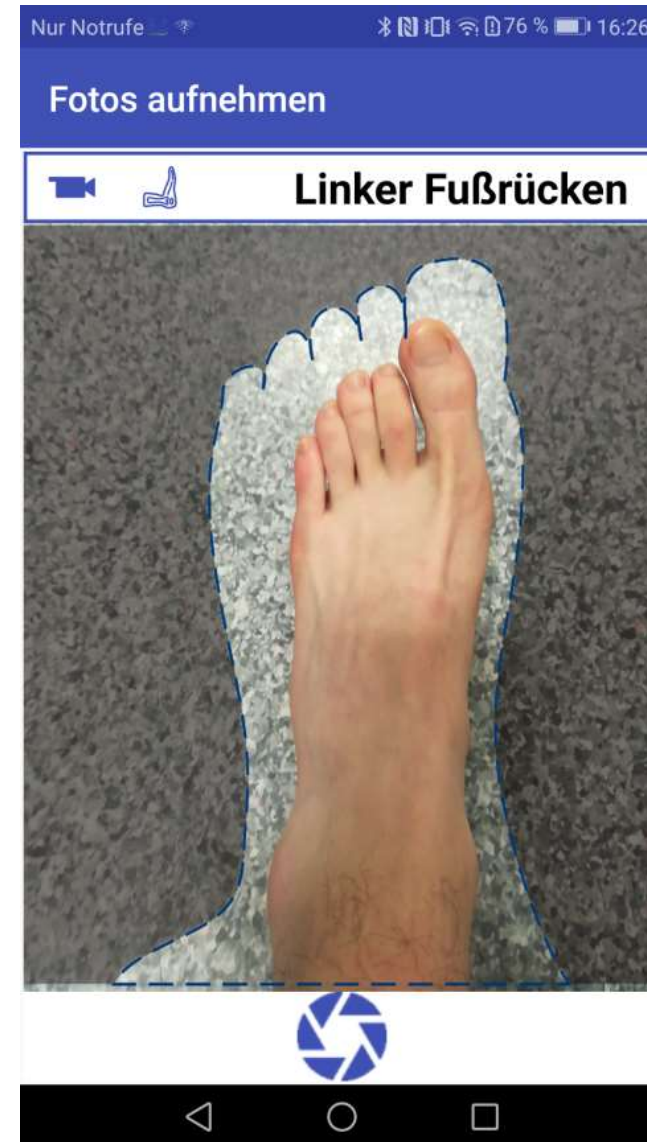

# Photographing with camera of mobile phone

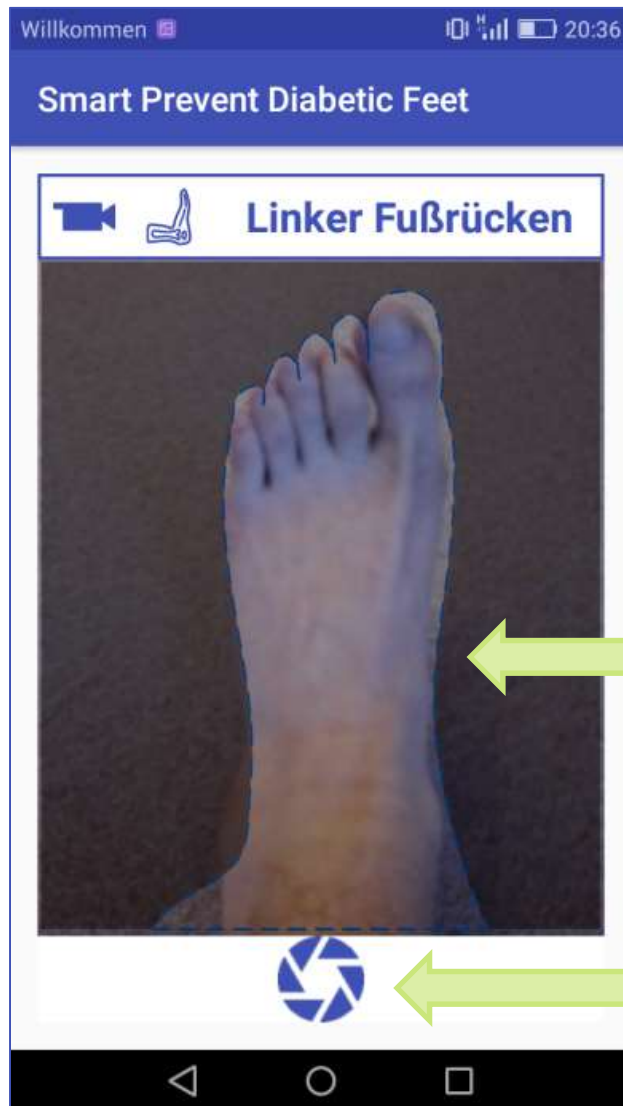

foot to be photographed

framework specification

capture

# Photographing with camera of mobile phone

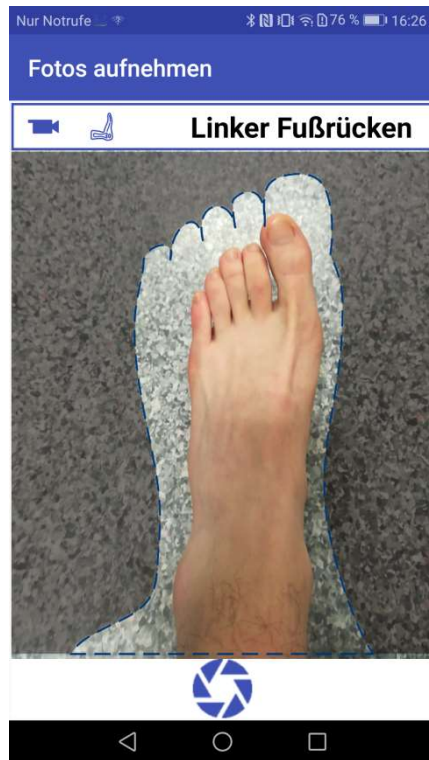

**Step one:**  
Photo left  
arch of the foot

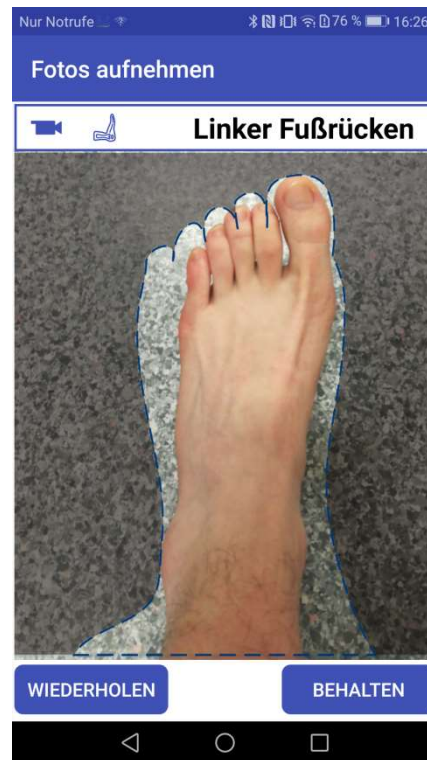

**Step two:**  
Keep or discard  
photo

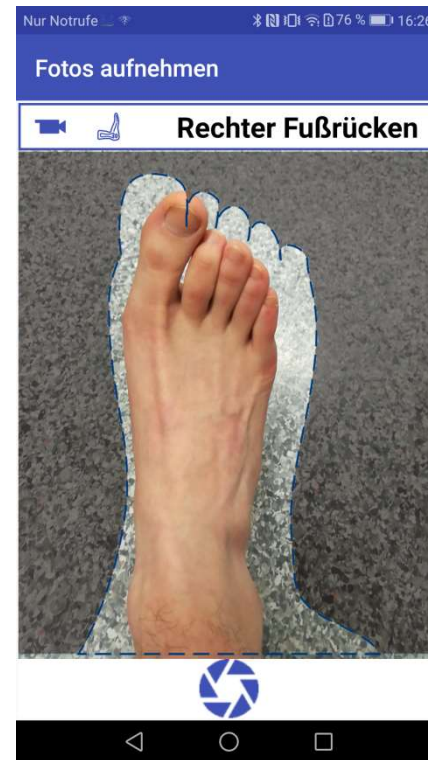

**Step three:**  
Photo right back  
of foot

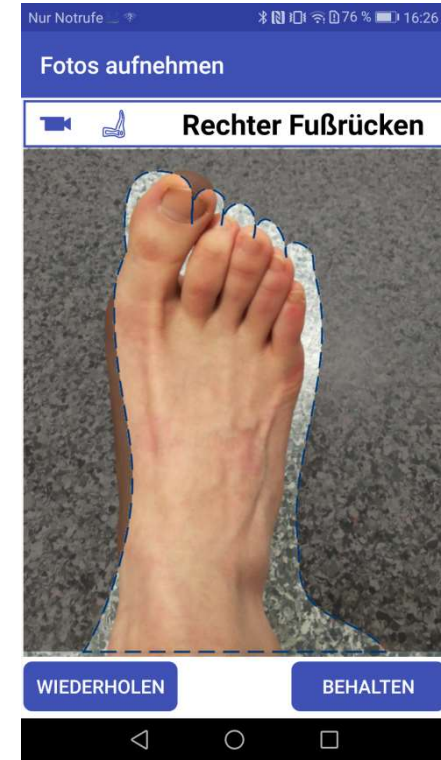

**Step four:**  
Keep or discard  
photo

# Photographing with camera of mobile phone

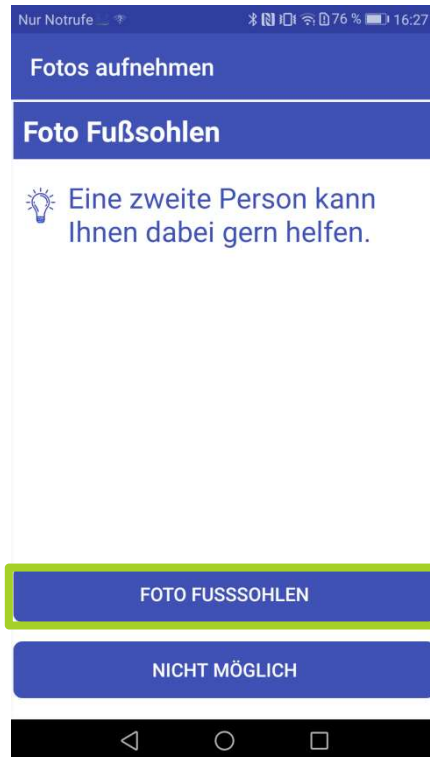

**Step five:**  
Read the text of the note on soles

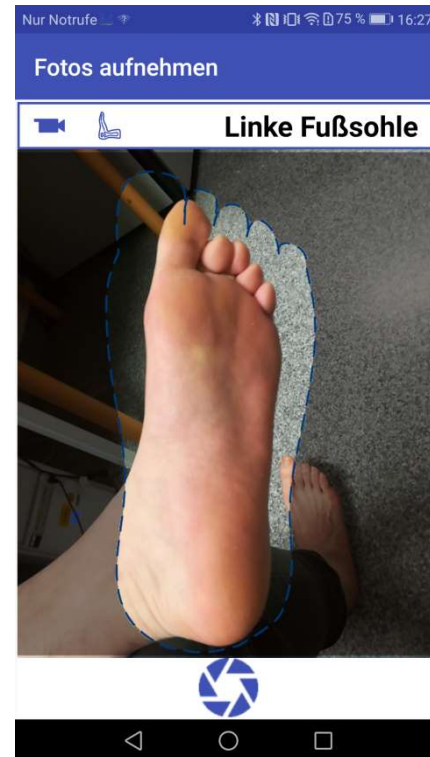

**Step six:**  
Photo left sole of foot

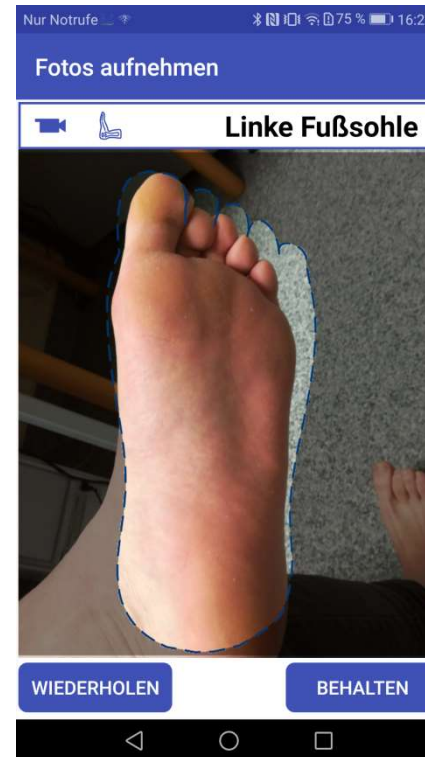

**Step seven:**  
Keep or discard photo



# Photographing with camera of mobile phone

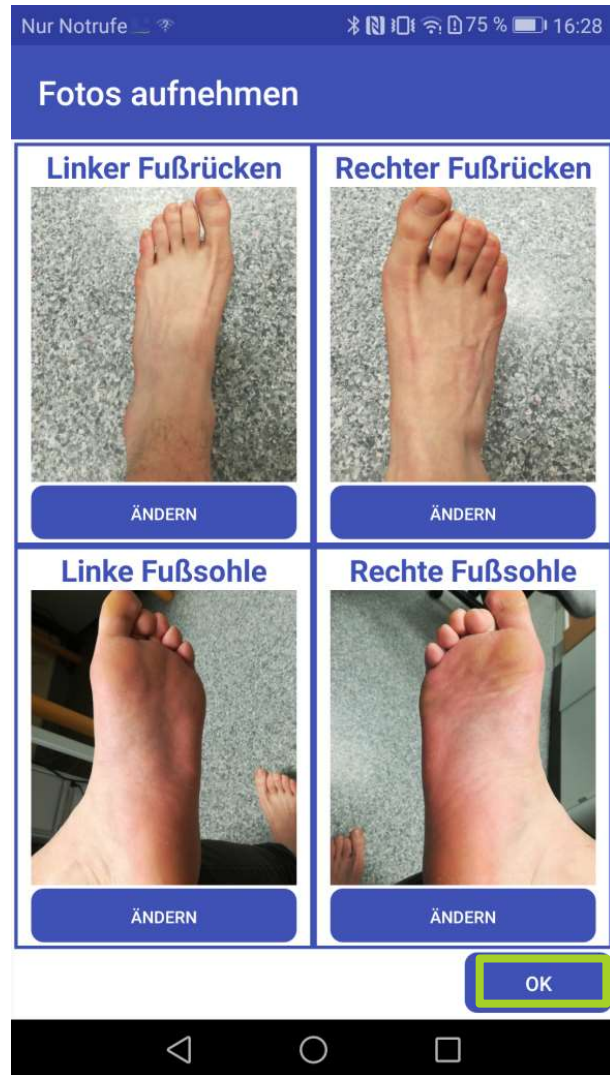

Repeat single images

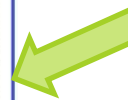

Press Ok

# Photo / Gallery

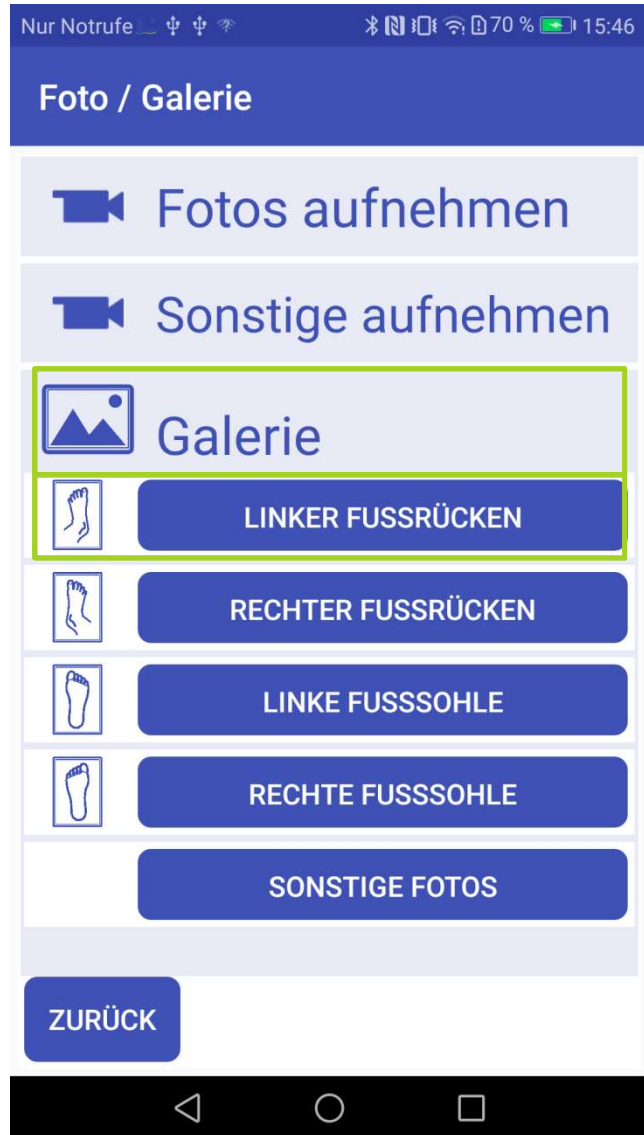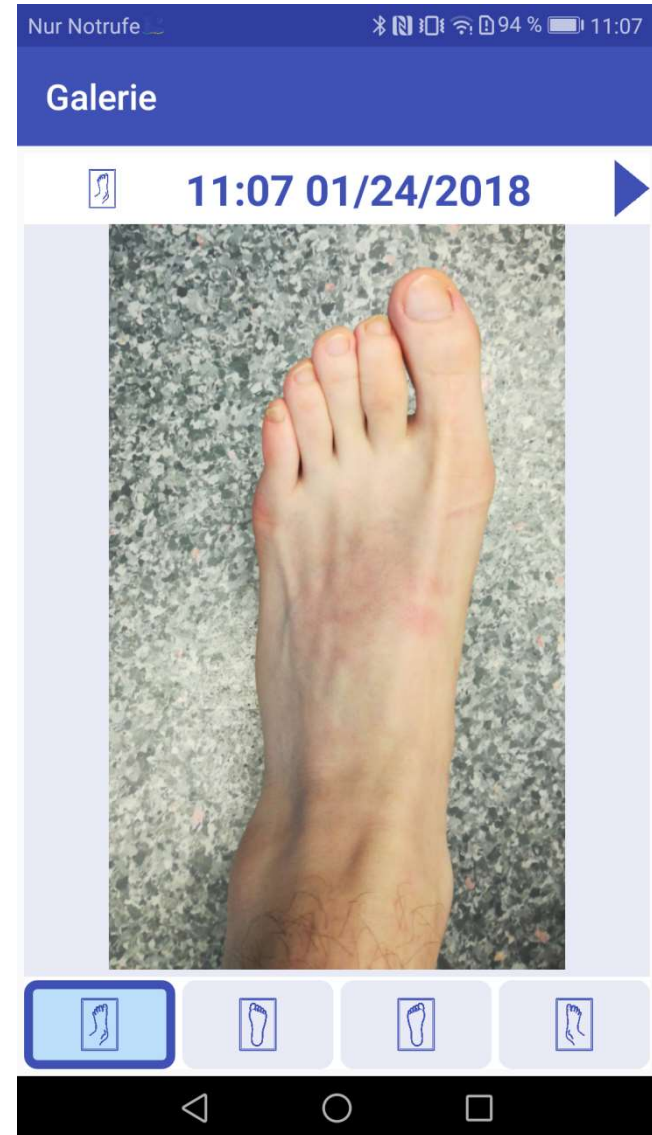

# Photo / Gallery

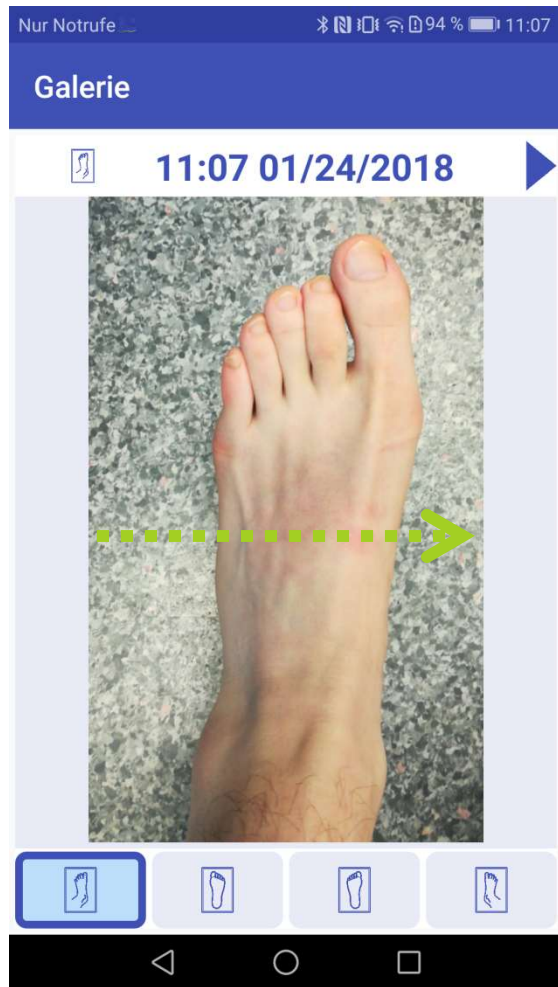

**Date of recording**

**Wipe photos to the side with your finger to view them**

**Select foot areas**

# Create a diary entry



## Smart Prevent Diabetic Feet

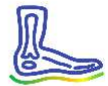

Studien-Scan

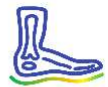

Fremd-Scan

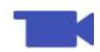

Foto / Galerie

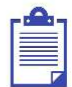

Historie

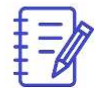

Tagebuch

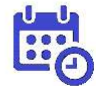

Kalender

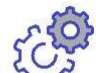

Einstellungen

Notes on your **state of health** and daily foot examination

# Home Diary

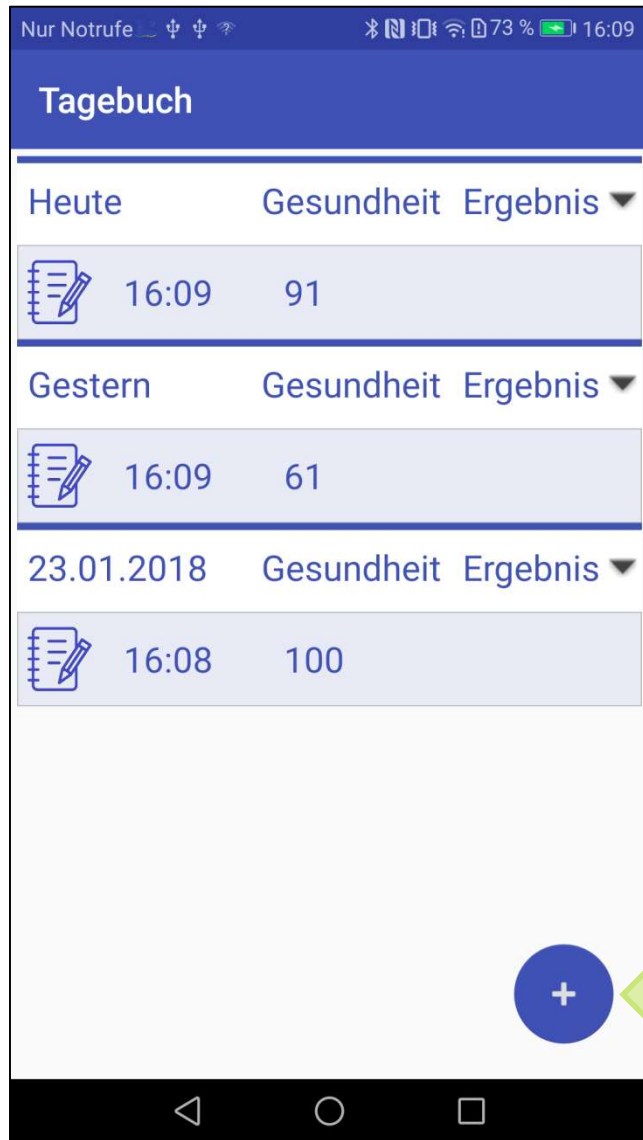

View / change entry

new entry

# New diary entry

mobile phone application

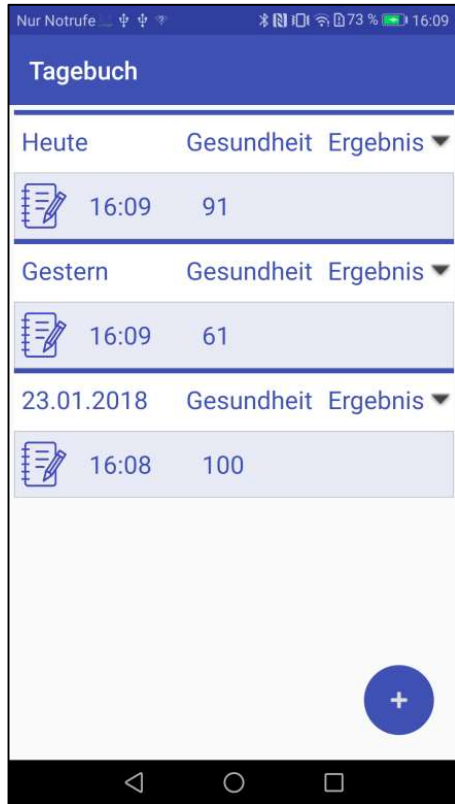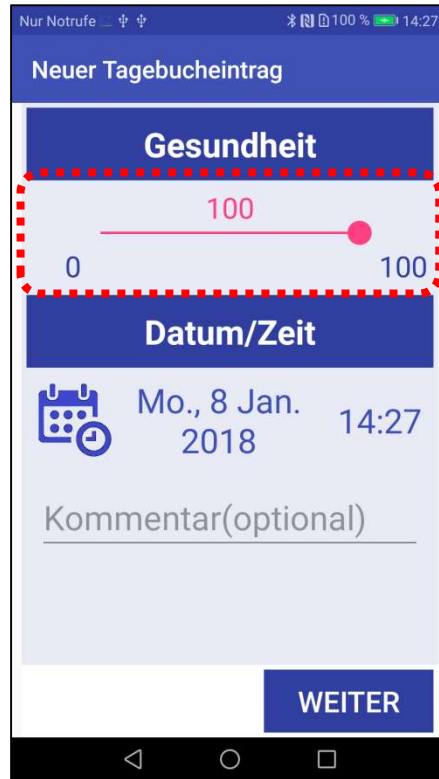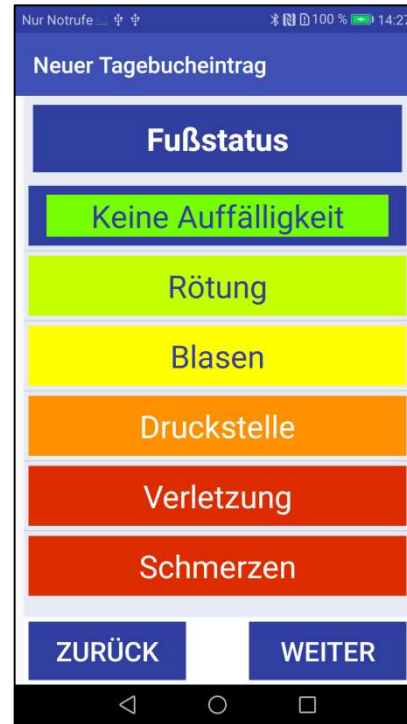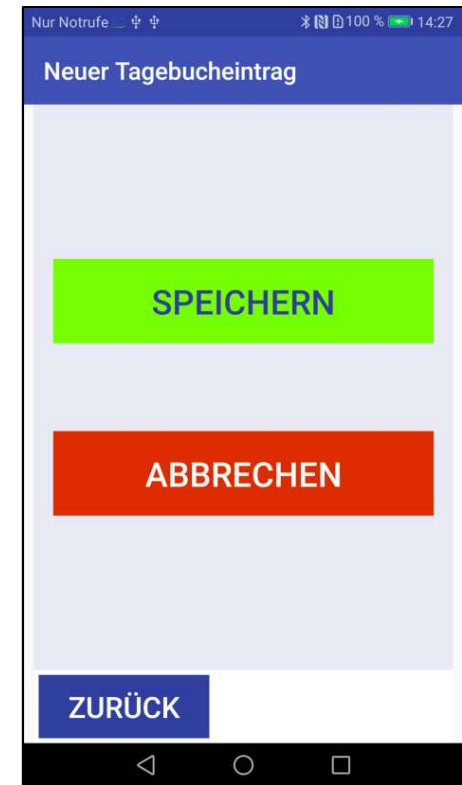

# Calendar / Dates

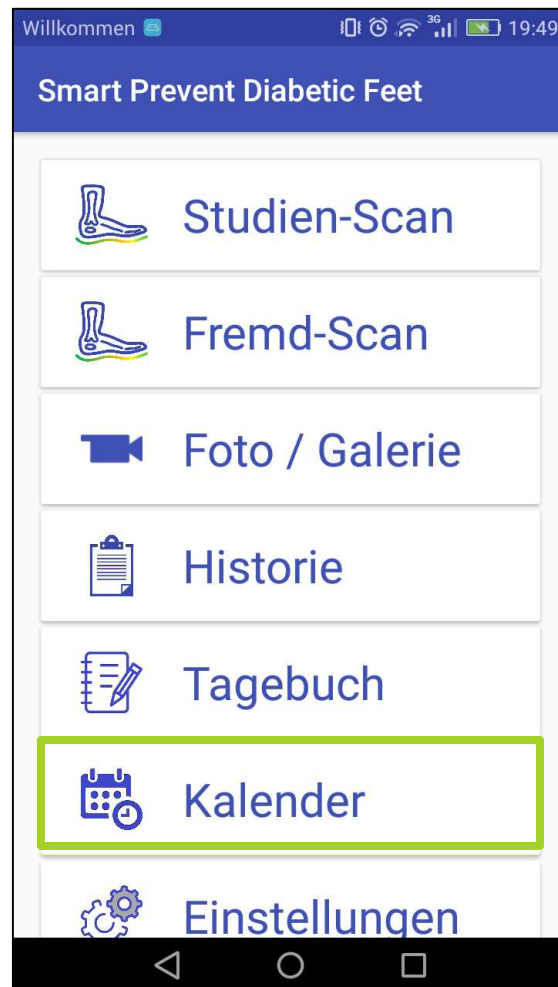

## scheduling

Study visits, measurements,  
medical appointments, taking medication, etc.

# Calendar / Dates

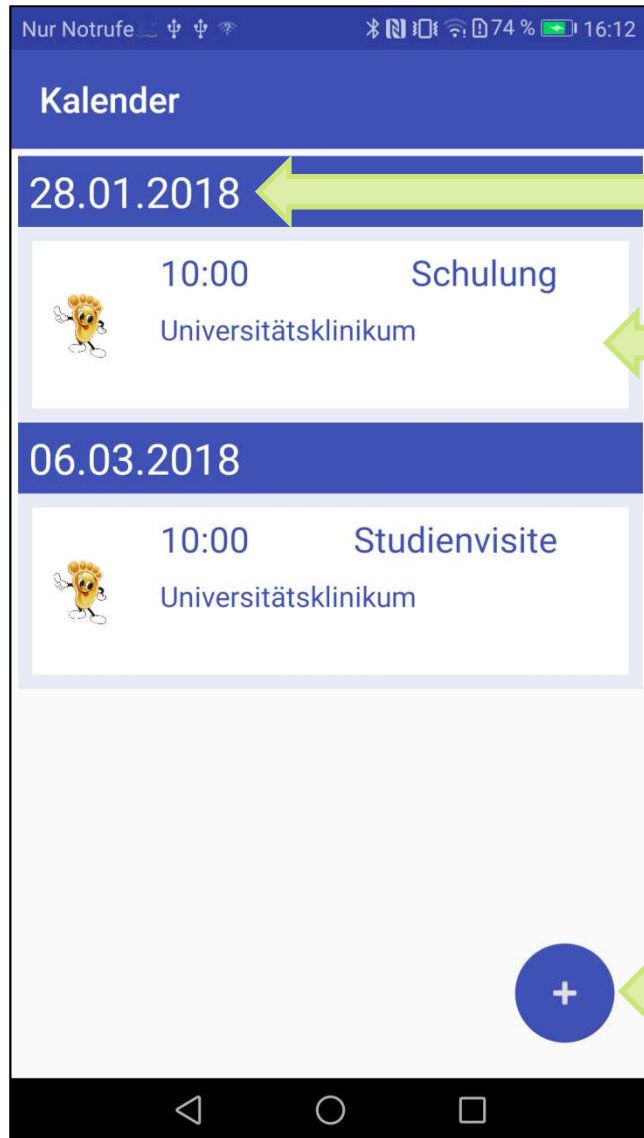

← **date**

← **Date (time / type / location)**

← **new appointment**

# New calendar entry

mobile phone application

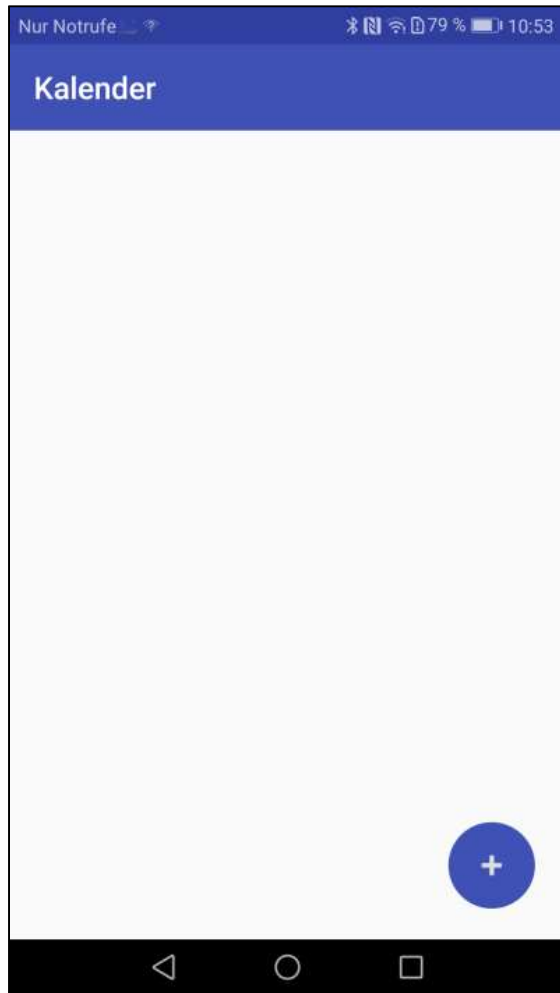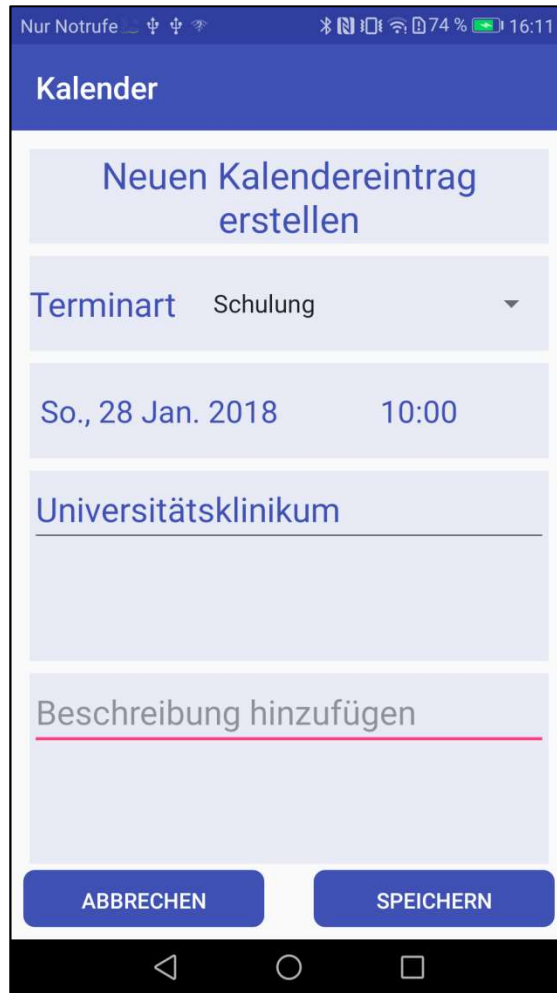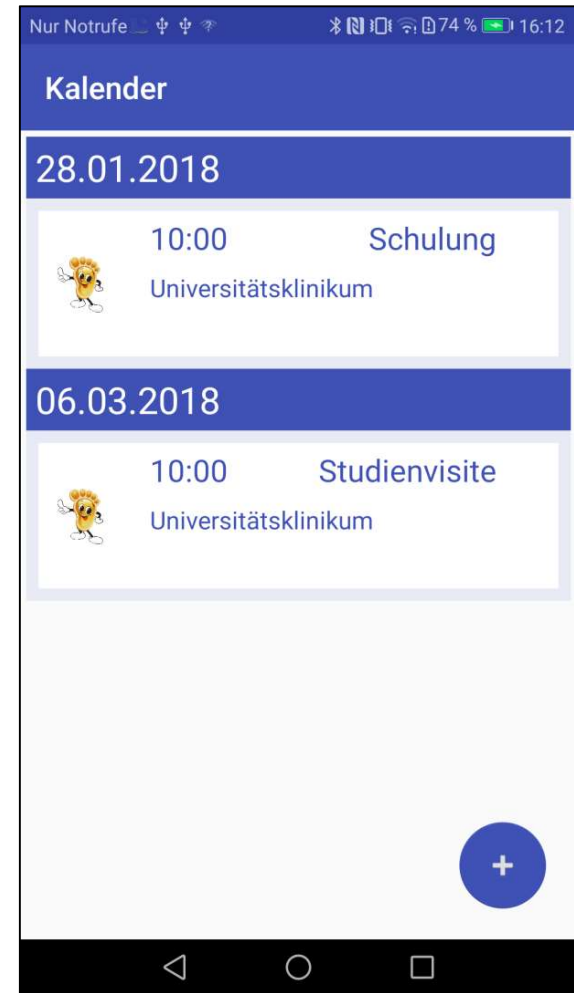

# settings

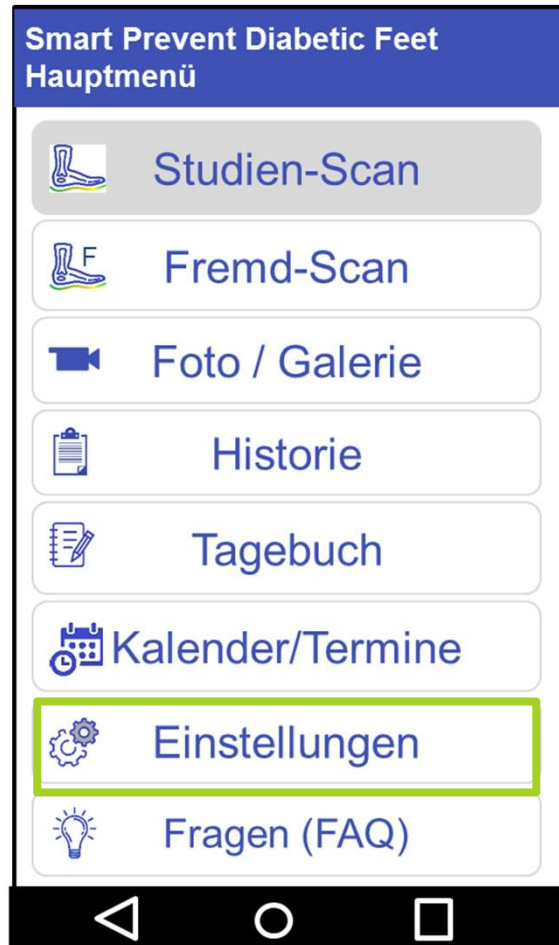

Hauptmenü

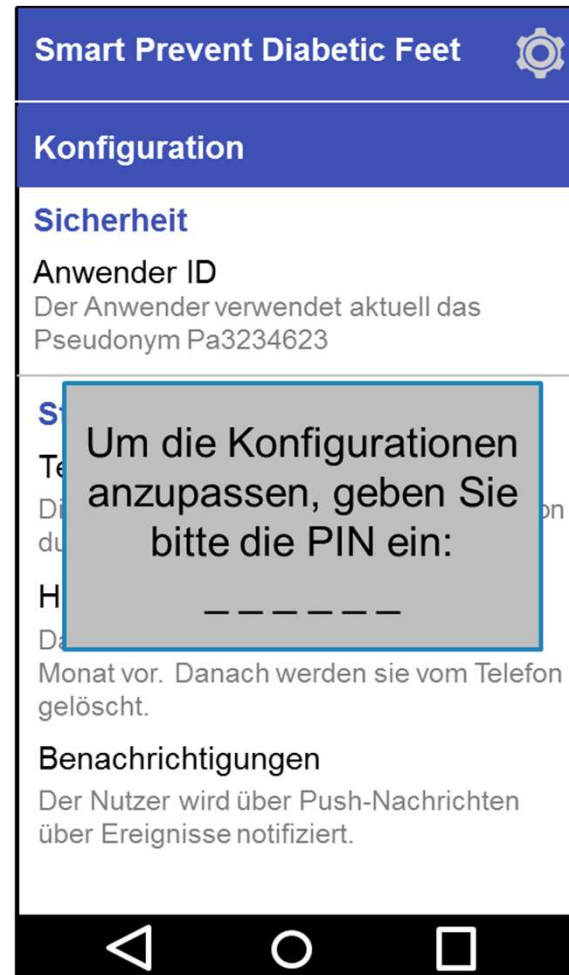

Only for  
Study Center!!!

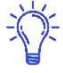

# Questions (FAQ)

mobile phone application

## Smart Prevent Diabetic Feet Questions (FAQ)

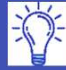

Survey

Battery

Bluetooth and  
connection to the sole

Intelligent insole

Measurement

Around the diabetic foot

Sensors

Software copyright  
notice

Contact us

## Smart Prevent Diabetic Feet Questions (FAQ)

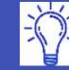

Sensors

Software copyright  
notice

Contact us

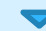

study leader

Prof. Dr. med. Peter R. Mertens  
Director of the Clinic for Kidney  
and Hypertension Diseases,  
Diabetology and Endocrinology  
Secretary's office: Mrs. C. Kluge  
phone: 0391-6713236  
Telefax: 0391-6715440

E-mail:  
Nephrologie@med.ovgu.de

study team

Coordinating Inspector



## ...and on vacation

take your shoes with you on holiday

Holidays in **Germany**: no restrictions

Holidays **abroad**: data transmission to the study centre is interrupted

Measured values are stored in the soles.

Transmission/evaluation on return

Feedback from the study centre only possible after returning home

In case of longer planned measurement failures, **please inform Study Centre**

## ... in case of illness

For inpatient stays and planned measurement failures  
please contact Study Center (by phone)

## Functions of the App

**Detect and prevent ulcers**

*study scan*

**Document foot injuries**

*Photo/Gallery*

**Keeping an eye on your well-being**

*diary*

## For technical problems

### Reasons for incorrect measurements

1. soles are not sufficiently loaded
2. other devices interfere with reception
3. observe the sequence of the measurement

# Thank you for your attention!

Isabell.walter@med.ovgu.de

ahmad.alhajjar@med.ovgu.de

**Clinic for Nephrology and Hypertension,  
Diabetology and Endocrinology  
Otto von Guericke University Magdeburg**

# external scan

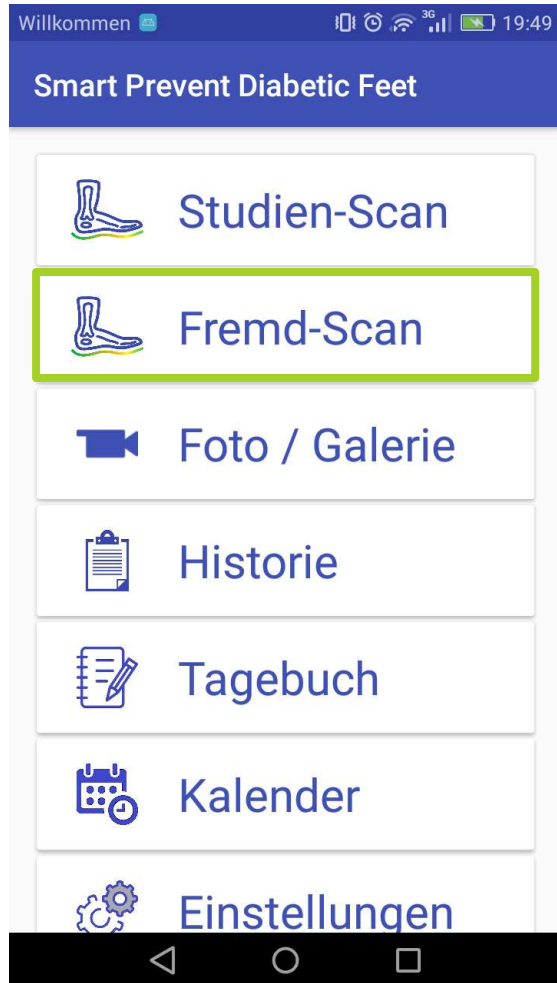

## For friends & family to test the sole

Study scan without consequences  
(Values are not recorded in the study center)

## Contact details

Clinic for Nephrology and Hypertension,  
Diabetology and Endocrinology,  
Otto-von-Gueircke University Magdeburg

House 60 B, Level 2

Phone: 0391 /67-21615

0391 /67-21745

E-mail: [Claudia.Piehler@med.ovgu.de](mailto:Claudia.Piehler@med.ovgu.de)

[Isabell.Walter@med.ovgu.de](mailto:Isabell.Walter@med.ovgu.de)

[Ahmad.Alhajjar@med.ovgu.de](mailto:Ahmad.Alhajjar@med.ovgu.de)

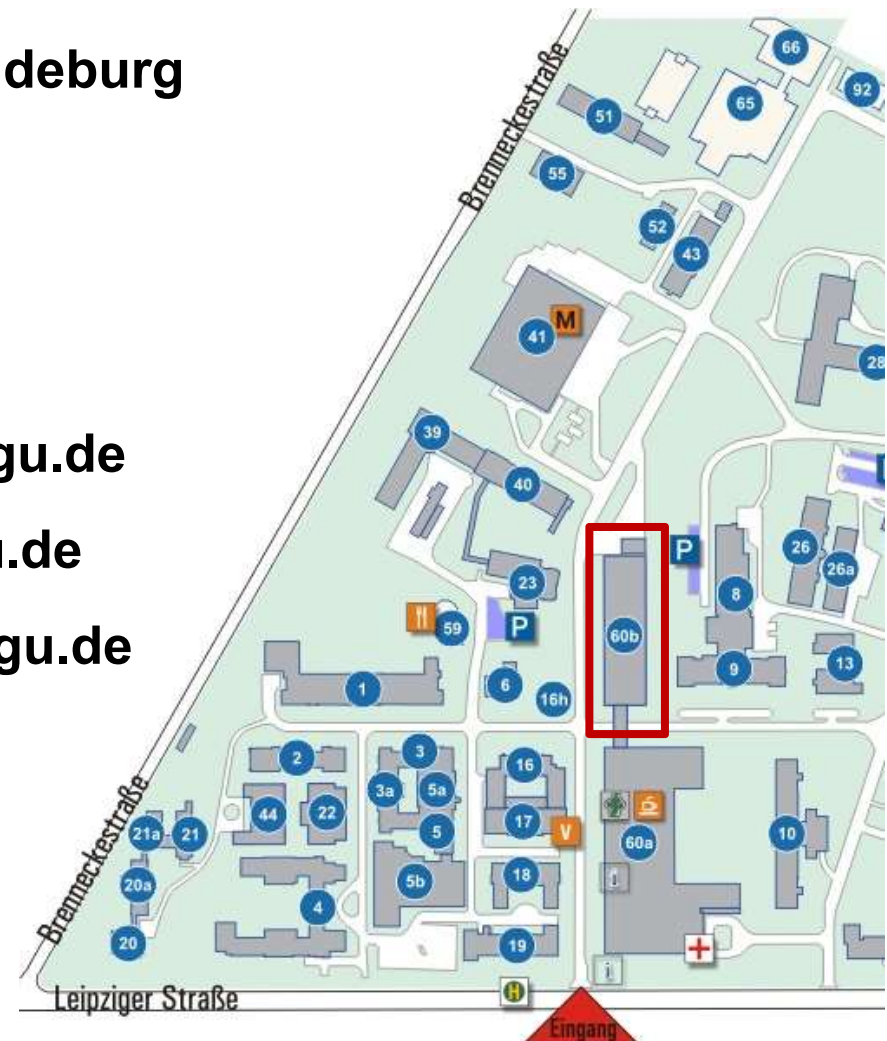





# The study's app: recognition logo

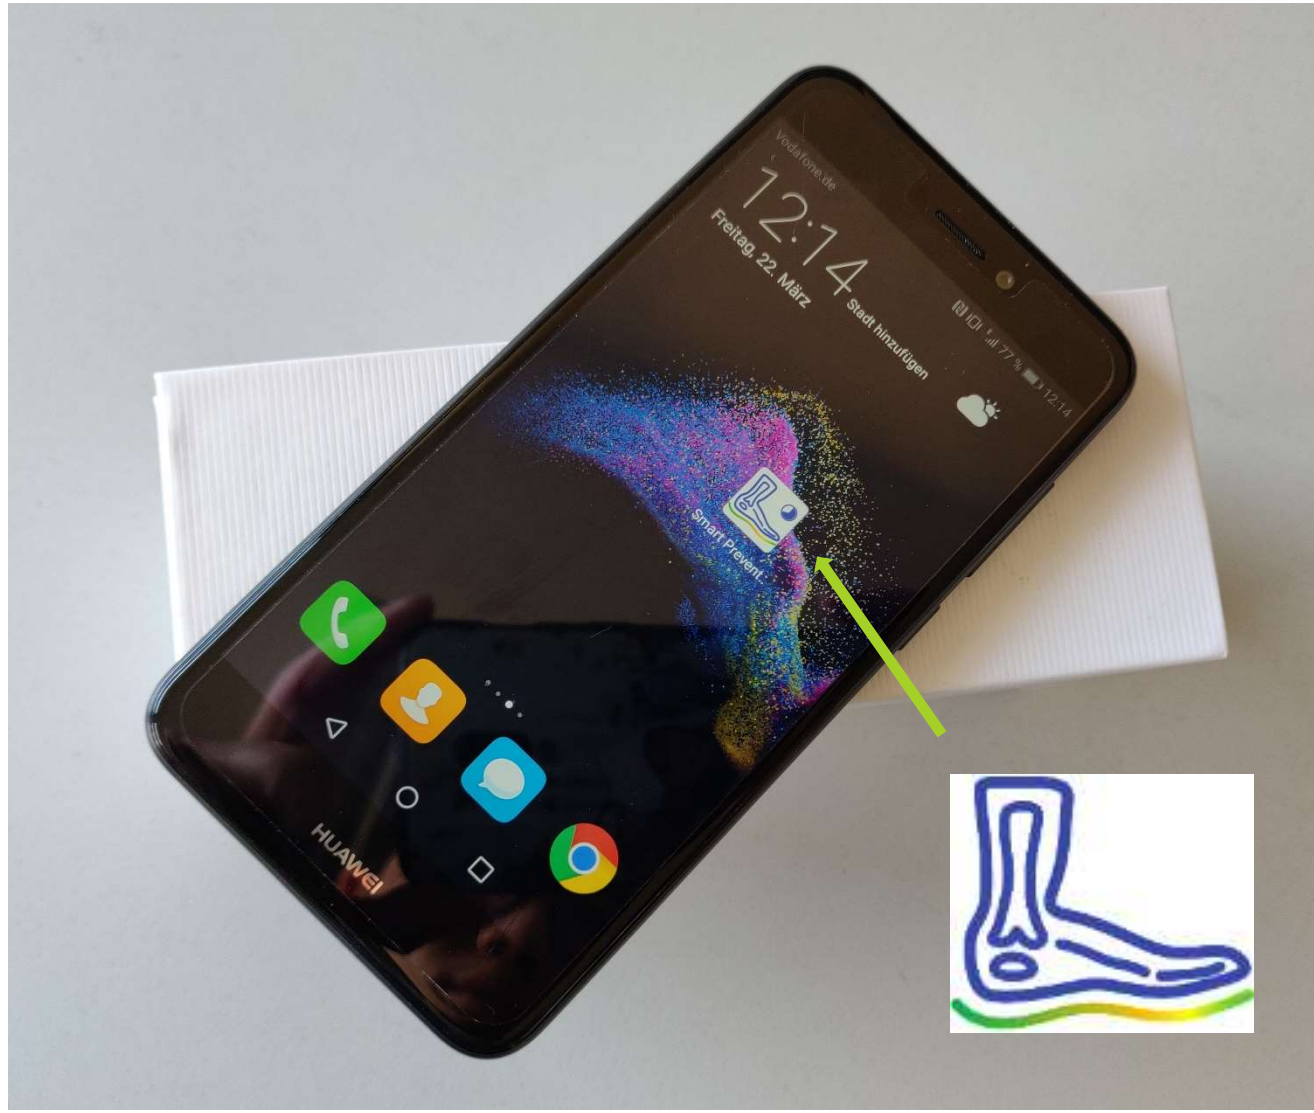

mobile phone application

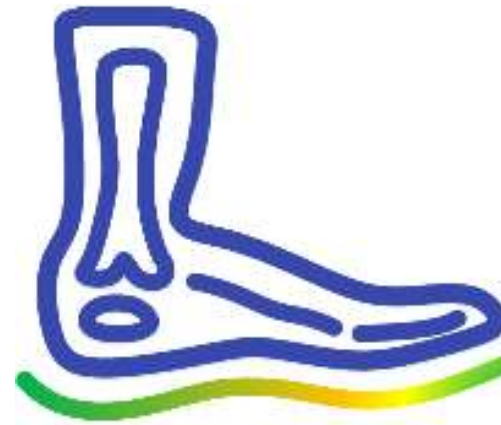

study scan
